# The role of small non-coding RNAs in genome stability and chromatin organization

Josien C. van Wolfswinkel and René F. Ketting\*

Hubrecht Institute-KNAW and University Medical Centre Utrecht, Uppsalalaan 8, 3584 CT Utrecht, The Netherlands

\*Author for correspondence ([r.ketting@hubrecht.eu](mailto:r.ketting@hubrecht.eu))

Journal of Cell Science 123, 1825-1839

© 2010. Published by The Company of Biologists Ltd

doi:10.1242/jcs.061713

## Summary

Small non-coding RNAs make up much of the RNA content of a cell and have the potential to regulate gene expression on many different levels. Initial discoveries in the 1990s and early 21st century focused on determining mechanisms of post-transcriptional regulation mediated by small-interfering RNAs (siRNAs) and microRNAs (miRNAs). More recent research, however, has identified new classes of RNAs and new regulatory mechanisms, expanding the known regulatory potential of small non-coding RNAs to encompass chromatin regulation. In this Commentary, we provide an overview of these chromatin-related mechanisms and speculate on the extent to which they are conserved among eukaryotes.

**Key words:** Argonaute, Chromatin, Germ cell, Methylation, piRNA, siRNA

## Introduction

Although RNA was initially considered to be a passive intermediate in the flow of information from DNA to protein, the regulatory capacity of RNA is now well established. For several decades, it has been known that non-coding RNAs, such as prokaryotic ~100-nucleotide MicC and micF, can modulate translation efficiency through base pairing to an mRNA and altering its accessibility to ribosomes (Mizuno et al., 1984). However, the discovery of RNA interference (RNAi) by Craig Mello and Andrew Fire in 1998 showed that there is a class of much smaller RNAs (20-30 nucleotides) that have a high regulatory capacity (Fire et al., 1998). These small regulatory RNAs represent an ancient regulatory mechanism, as mirrored by their presence in organisms ranging from yeast to plants and animals. Moreover, their silencing principles are widely conserved and typically involve a protein of the Argonaute family (Box 1). Over the past few years, it has been revealed that there is a world of small non-coding RNAs that not only regulate gene expression on post-transcriptional and transcriptional levels, but also affect the organization and modification of chromatin. In this Commentary, we concentrate on this latter role of small non-coding RNAs, highlighting their involvement in transposon control, centromere function, silencing of the unpaired sex chromosome during meiosis, paramutation and DNA elimination. Before delving into these specific areas, we first introduce concepts concerning RNAi and chromatin that are relevant to these topics.

Small-interfering RNAs (siRNAs) of ~21 nucleotides are the central players in many RNAi mechanisms (Fig. 1). They can be produced from long double-stranded RNA (dsRNA) through cleavage by the endonuclease Dicer and are bound by an Argonaute protein. siRNAs identify their target by perfect sequence complementarity and establish silencing of the recognized mRNAs (Fig. 1A). The source of the initial dsRNA can be either exogenous (e.g. from viral replication) or endogenous (Fig. 1B). Expression of endogenous siRNAs is often tissue- or developmental-stage-specific, with a bias towards expression in reproductive tissues or stages.

The genomes of many organisms encode machinery to amplify siRNAs after target recognition (Baulcombe, 2007): the target

recognized by the primary siRNA recruits an RNA-directed RNA polymerase (RdRP), which synthesizes new RNA that is antisense to the target (Fig. 1). In some organisms, this results in the formation of new dsRNA, which is processed by Dicer into secondary siRNAs; in other organisms, Dicer is not involved in the amplification step and the RdRP is thought to synthesize single-stranded secondary siRNAs directly. Although only a subset of eukaryotes (including *Schizosaccharomyces pombe*, *Neurospora*, *Caenorhabditis elegans* and plants) encode an obvious RdRP enzyme in their genomes, several other animal species were recently found to possess RdRP activity mediated by divergent enzyme complexes (Lipardi and Paterson, 2009; Maida et al., 2009). This suggests that amplification of siRNAs is potentially more widely conserved than the conservation of the RdRP enzyme suggests.

Many animals (including *Drosophila*, zebrafish and mammals) carry a germline-enriched class of small RNAs, called Piwi-interacting RNAs (piRNAs) (for a review, see Klattenhoff and Theurkauf, 2008). piRNAs are longer (24-30 nucleotides) than siRNAs and have some conserved sequence features due to their biogenesis pathway. They bind to a germline-specific subset of Argonaute proteins, referred to as Piwi proteins (Box 1). Their biogenesis is independent of Dicer, but depends on an amplification cycle catalyzed by the Piwi proteins themselves.

Two major types of chromatin-silencing modifications have been correlated with small-RNA-mediated genome surveillance: histone modification and DNA methylation. Histone proteins consist of a globular core and extending tails at their N-terminal and C-terminal ends. Several different amino acid modifications have been described in histone proteins, mostly within the N-terminal tails, including acetylation, methylation, ubiquitylation, SUMOylation, ADP ribosylation and phosphorylation [for a detailed review, see Kouzarides (Kouzarides, 2007)]. Modifications of histone tails can alter the interactions between the histones and other nucleosomes, or can create binding sites for a variety of chromatin-modifying proteins that translate (combinations of) modifications into chromatin-condensing or -relaxing activities. An acetylated arginine residue, for example, is typically recognized

**Box 1. Argonautes**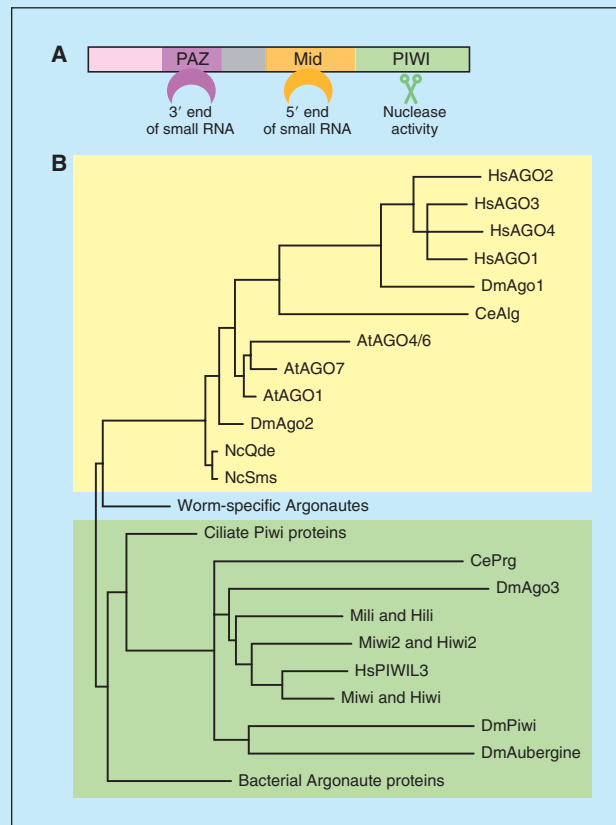

Argonaute proteins are small-RNA-binding proteins that are characterized by the presence of three domains: the PAZ domain, the Mid domain and the PIWI domain (see Figure, part A). The PAZ domain forms a binding pocket for the 3' end of the small RNA, whereas the 5'-terminal nucleotide is bound by the Mid domain [for a review and the crystal structure, see Ender and Meister (Ender and Meister, 2010)]. The PIWI domain has catalytic endonuclease activity, referred to as slicing. The slicer activity allows the Argonaute to degrade one of the strands of the dsRNA, thereby exposing the single-stranded RNA and allowing it to detect its target by sequence complementarity (Leuschner et al., 2006; Matranga et al., 2005; Rand et al., 2005; Steiner et al., 2009). Slicer activity is also involved in the degradation of target mRNAs, although it is often not required for downstream silencing effects; several Argonautes have been identified that do not possess this endonuclease activity but still function in silencing pathways (Yigit et al., 2006).

The genomes of most organisms encode multiple Argonaute proteins. An Argonaute typically binds to one specific type of small RNA (an miRNA, siRNA or piRNA) and, by interacting with other proteins, plays a decisive role in determining the downstream effects of the small RNA. Argonautes are roughly divided into two subclasses based on their alignment: the Ago proteins (yellow area in Figure, part B), which resemble *Arabidopsis* AGO1, and the Piwi proteins (green area in Figure, part B), which resemble *Drosophila* Piwi. Ago proteins are present in both plants and animals, but Piwi proteins are only found in animals and are generally germline-specific. In worms, a third type of Argonaute is present, most of which bind to secondary siRNAs (Yigit et al., 2006). At, *Arabidopsis thaliana*; Ce, *Caenorhabditis elegans*; Dm, *Drosophila melanogaster*; Hs, *Homo sapiens*; Nc, *Neurospora crassa*.

by proteins that have a bromodomain and is associated with active transcription. Conversely, lysine methylation can be associated with either activation or repression of transcription, depending on the exact site of the mark. Methylation of lysine 9 of histone 3 (H3K9me) can be recognized by chromodomain proteins, such as heterochromatin protein 1 (HP1), which recruits deacetylating activity to the locus and induces packaging into inactive heterochromatin. Methylated lysine 4 of the same histone (H3K4me) can be bound by double-chromodomain proteins, such as CHD1, or by plant homeodomain (PHD) proteins, and recruits enzymatic activities that promote active, open chromatin. It is, however, important to note that the effect of a histone modification is highly dependent on its total context – it is too simplistic to regard individual modifications as being activating or repressing. In the context of small-RNA-induced chromatin modification, the H3K9 methylation has been best described. This modification is recognized by the RNA-induced transcriptional silencing (RITS) complex, as will be discussed below.

Although not common to all eukaryotes, methylation of DNA itself constitutes a more stable type of modification than histone modification. Cytosines, particularly those in a CpG context, can be methylated in the DNA of plants and mammals. CpG methylation is symmetrical and found in both sister chromatids following genome duplication. Non-CpG methylation often is asymmetrical and must be readjusted after every cell division to be maintained, and is therefore less stable than symmetrical methylation. Non-CpG methylation has mainly been described in plants. Both types of DNA methylation generally induce the formation of compact, inactive chromatin, although in plants some methylation of open reading frames is associated with active transcription (for a review, see Munshi et al., 2009; Quina et al., 2006).

**Control of transposable elements**

Transposable elements were first discovered in the 1940s (McClintock, 1950) and are now known to make up a large portion of the genomes of most organisms. For example, 10% of the *Arabidopsis* genome consists of transposons and transposon remains, and transposons account for 45% of the sequence of the human genome. The ability of transposons to integrate at novel sites in the genome makes them intrinsically mutagenic and therefore an important silencing target. Early on, the phenomenon of transposon silencing was found to have substantial genetic overlap with RNAi in *C. elegans* (Ketting et al., 1999; Sijen and Plasterk, 2003; Tabara et al., 1999; Tijsterman et al., 2002; Tops et al., 2005; Vastenhouw et al., 2003). However, it is still unknown whether transposon silencing in worms happens at a post-transcriptional or transcriptional level.

**siRNAs and transposon silencing in *Arabidopsis thaliana***

Plants use special 24-nucleotide siRNAs to control transposons in their genomes (Chan et al., 2004; Hamilton et al., 2002; Llave et al., 2002; Qi et al., 2006). The origin of these siRNAs is still largely unknown, but is probably some type of dsRNA (Fig. 1B). The induction of transposon silencing in plants is a two-step process; each step involves a plant-specific RNA polymerase (Daxinger et al., 2009) (Fig. 2A). In the first step, RNA polymerase IV (Pol IV) assists in the creation of an siRNA population by initiating transcription from specific loci. Pol IV is required for transposon control, as loss of Pol IV leads to transcriptional reactivation of several transposons (Huettel et al., 2006). How Pol IV identifies the target loci, however, is currently unclear. A second enzyme

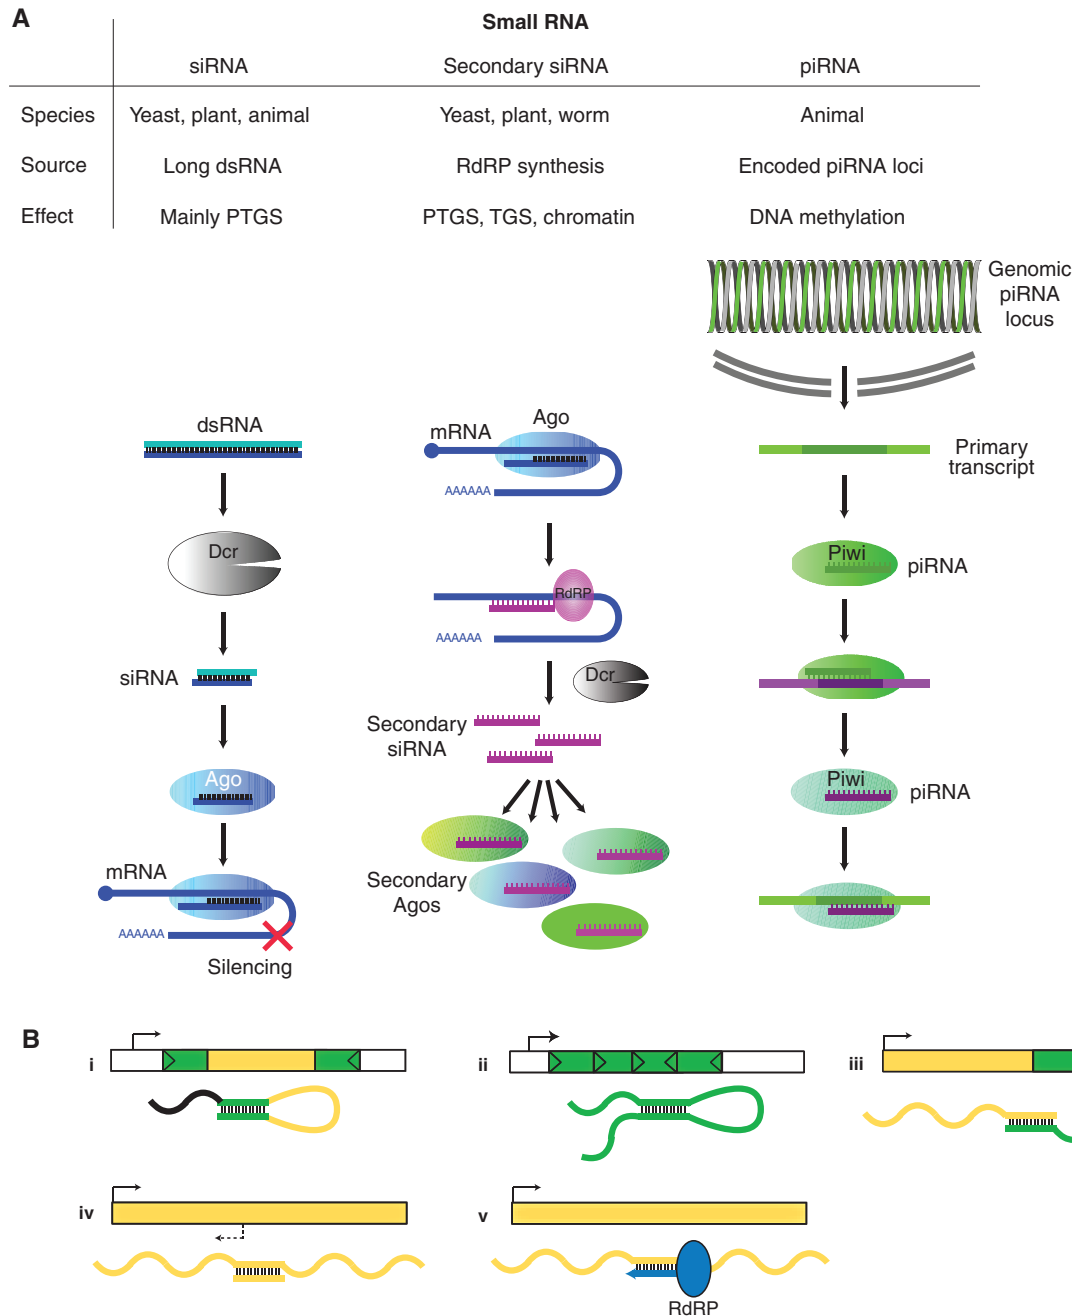

**Fig. 1. Characteristics and biogenesis of small RNAs (siRNAs, secondary siRNAs and piRNAs).** (A) siRNAs are generally derived from dsRNA, which is fragmented by Dicer (Dcr) into ~21-nucleotide siRNAs. The siRNA is bound by an Argonaute protein, which selects one of the strands as the guide strand and disposes of the other strand. Together, the Argonaute and the siRNA form the core of the RNA-induced silencing complex (RISC) and target mRNAs for silencing, commonly by degradation. In many organisms, targeting of an mRNA can induce the synthesis of secondary siRNAs. The mRNA recognized by the RISC recruits an RdRP enzyme, which synthesizes new RNA that is antisense to the mRNA. In some organisms, this results in the formation of dsRNA, which is again fragmented by Dicer; in other organisms, such as worms, Dicer is not involved in the amplification step and secondary siRNAs are probably synthesized as relatively short single-stranded RNAs (Pak and Fire, 2007; Sijen et al., 2007). The secondary siRNAs are often bound by specific secondary Argonaute proteins. Particularly in worms, a wide variety of these secondary Argonautes are encoded, allowing the diversification of the downstream silencing response. Synthesis of piRNAs is independent of Dicer and instead uses the slicing activity of two different Piwi proteins to create an amplification system referred to as the ping-pong cycle (Brennecke et al., 2007; Gunawardane et al., 2007). The initial trigger for this cycle is thought to be a single-stranded primary transcript derived from a piRNA locus. The downstream effects of piRNAs are not exactly known, but they are involved in transposon silencing. (B) dsRNA can arise from endogenous loci by various scenarios. (i) Many transposons are flanked by terminal inverted repeats (TIRs). Therefore, transcription through a single transposon could result in 'snapback' of the TIRs, leading to a short stretch of dsRNA. (ii) Read through from an external promoter into a cluster of repetitive elements with random orientation can also result in dsRNA by means of snapback. (iii) Convergent transcription of two genes that are located closely together can lead to dsRNA at the region of overlap if transcription occurs roughly simultaneously and in the same cell. (iv) An internal (cryptic) antisense promoter could give rise to bidirectional transcription, resulting in dsRNA. (v) dsRNA can, of course, also be the result of RdRP activity on a single-stranded RNA.

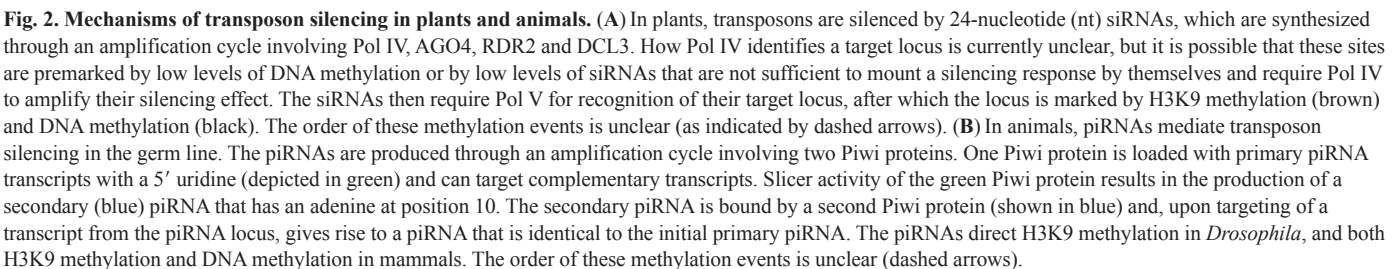

The second step in plant transposon silencing involves the recruitment of chromatin modifications to the transposon sequence through binding by the siRNA-loaded AGO4. This step requires the plant-specific RNA polymerase Pol V (also known as Pol IVb) to create a platform for siRNA binding (Wierzbicki et al., 2008). It is possible that Pol V synthesizes RNA transcripts from the target loci, which can in turn be recognized by the siRNAs; an alternative possibility is that Pol V just opens up the chromatin to allow access to the transposon site.

Plant transposon loci are marked by histone H3K9 methylation (Ding et al., 2007; Gendrel et al., 2002; Mette et al., 2000; Sijen et al., 2001; Wassenegger, 2000) and by DNA methylation (Cokus et al., 2008; Lister et al., 2008; Miura et al., 2001). Histone methylation requires the histone methyltransferase KYP and also involves the chromatin-remodeling factors DRD1 and DDM1 (Chan et al., 2006; Hirochika et al., 2000; Jeddloh et al., 1998; Kanno et al., 2004). All transposable elements in the genome seem to be targeted equally by H3K9 methylation (Tran et al., 2005). DNA methylation by the symmetrical CpNpG methyltransferase CMT3 marks the same loci as KYP, whereas the CpG methyltransferase MET1 and the de novo methyltransferase DRM2 target only a subset of transposable elements (Tran et al., 2005). Although each of the individual methylation marks contributes to the silencing of transposon loci, the extent to which each contributes



is different (Cao and Jacobsen, 2002; Kato et al., 2003; Zhang et al., 2006).

The three silencing mechanisms discussed above (siRNAs, histone methylation and DNA methylation) are intricately related (Johnson et al., 2002; Lippman et al., 2003). The DNA CpG methyltransferase MET1 (but not CMT3) directs the distribution of H3K9 methylation to target loci (Johnson et al., 2002; Soppe et al., 2002; Tariq et al., 2003). In turn, H3K9 methylation can recruit the CpNpG methylase CMT3, thereby reinforcing DNA methylation (Jackson et al., 2002; Lindroth et al., 2004). Argonaute AGO4 is involved in both histone methylation and non-CpG DNA methylation (Tran et al., 2005; Zilberman et al., 2003), which places the small RNAs downstream of MET1 and upstream of KYP and CMT3. The molecular mechanism of this interdependence is not entirely clear, but it is conceivable that the chromatin-remodeling factors are recruited to the DNA by AGO4 (the positioning of which is probably directed by Pol V activity), where they facilitate access to the locus for de novo DNA methyltransferases and histone methyltransferases.

In support of this view, AGO4 was shown to interact with Pol V (Li et al., 2006; Pontier et al., 2005) and with Pol-V-generated RNA at the target loci (He et al., 2009), and to direct DNA methylation to the transposon site. However, although all transposons are targeted by siRNAs, loss of AGO4 leads to de-silencing of only some transposons (Lu et al., 2006). In addition, Mosher et al. found that Pol V can silence a subset of transposons by DNA methylation without a requirement for siRNAs (Mosher et al., 2008). Together, these results support a model whereby siRNAs direct silencing of some unstably silenced transposable elements, whereas constitutively silenced transposons are regulated by an RNA-independent mechanism in which siRNAs might be synthesized as a back-up system.

### piRNAs and transposon silencing in animals

In *Drosophila* and vertebrates, siRNAs play a role in transposon silencing in somatic tissues (Chung et al., 2008; Czech et al., 2008; Ghildiyal et al., 2008; Kawamura et al., 2008), but in germ cells transposons are mainly controlled by piRNAs, which bind to members of the Piwi clade of Argonaute proteins. A large fraction of *Drosophila* and zebrafish piRNAs map to transposon sequences (Brennecke et al., 2007; Houwing et al., 2007) and transposons are de-silenced in Piwi mutants (Aravin et al., 2001; Houwing et al., 2008; Vagin et al., 2004). These data support the idea that there is a close connection between piRNAs and transposon regulation.

How are the transposon-silencing effects of piRNAs established? In *Drosophila*, DNA methylation is less abundant than in plants and the main plant CpG methyltransferase, MET1, has no homolog in *Drosophila*. It was recently shown that the methyltransferase Dnmt2 can methylate retrotransposons in somatic cells (Phalke et al., 2009), but this enzyme appears to be inactive in the germ line and is therefore unlikely to be directed by piRNAs. Instead, several indications suggest that piRNA-mediated regulation of transposons in *Drosophila* correlates with histone modification. Mutations in Piwi-type Argonautes and related proteins induce mislocalization of H3K9 methylation and chromodomain proteins HP1 and HP2 (Klenov et al., 2007; Pal-Bhadra et al., 2004). Moreover, Piwi interacts directly with HP1 $\alpha$ , the *Drosophila* HP1 variant that is associated with transgene silencing (Brower-Toland et al., 2007). Furthermore, the RNA helicase Spindle E, which is required for transposon silencing, is also required for H3K9 methylation of several transposon classes (Klenov et al., 2007).

Although the proteins constituting this link between piRNAs and histone methylation have not yet been identified, the *Drosophila* homolog of KYP, the H3K9 methyltransferase Su(var)3-9, is a likely candidate.

In mice, two different subsets of piRNAs can be distinguished by the developmental stage in which they are expressed: pachytene piRNAs, which are bound by the Piwi proteins Mili and Miwi, and pre-pachytene piRNAs, which bind to Mili and Miwi2. Pachytene piRNAs mostly map to non-transposable sequences and appear to play a role in the regulation of meiosis. No links to chromatin have been demonstrated for these piRNAs so far. By contrast, a substantial fraction of pre-pachytene piRNAs map to transposon loci (Aravin et al., 2006; Carmell et al., 2007; Girard et al., 2006; Watanabe et al., 2006) and, moreover, some transposon de-silencing is detected in the Piwi mutants *mili* and *miwi2* (Aravin et al., 2007). In addition, transposons in mice are marked by DNA methylation and the re-establishment of this mark following demethylation in germ cells requires Piwi proteins Mili and Miwi2 (Aravin et al., 2008; Kuramochi-Miyagawa et al., 2008). Together, this suggests a role for piRNAs in the modification and silencing of transposon sequences.

There are three known active DNA methyltransferases (Dnmt1, Dnmt3a and Dnmt3b) in mice and DNA methylation of repetitive sequences by Dnmts is essential for development (Kato et al., 2007; Okano et al., 1999; Walsh et al., 1998). Interestingly, involvement of the catalytically inactive family member Dnmt3L is also required for correct targeting of transposon sequences, mainly during male meiosis (Bourc'his and Bestor, 2004; Hata et al., 2006; Webster et al., 2005). DNA methylation seems to be guided to transposons by H3K9 methylation (established by the H3K9 methyltransferase Suv39) and by the HP1 homolog Lsh1 (Huang et al., 2004; Lehnertz et al., 2003; Yan et al., 2003), although mutation of Suv39 results in only moderate upregulation of transposon activity (Martens et al., 2005). Unfortunately, the molecular links between piRNAs and Piwi proteins, and DNA methylation or histone methylation are currently unknown.

Although the small-RNA class that mediates transposon silencing differs between plants and mammals, the silencing effect is remarkably similar in both systems (Fig. 2). Small RNAs probably direct histone methylation and/or DNA methylation to achieve control of transposon loci. In addition, a subset of loci are very stably silenced independently of small RNAs, whereas other loci – probably the unstably silenced ones – require small RNAs to maintain silencing or to redefine the silencing through de novo methylation.

### Satellites and centromeres

Repetitive sequences are required for chromosome dynamics, but are also dangerous in terms of genome stability. A clear example of a repetitive region that is of vital importance to the cell is the centromere. Both the centromeric core and the pericentromeric region contain numerous repeats of short sequences (known as satellites) in most organisms (Box 2). In addition, the centromeres of many higher eukaryotes contain high levels of transposons and transposon remains. Work primarily conducted in the fission yeast *S. pombe* has shown that the repetitive pericentromeric region is a prominent target for small-RNA-mediated chromatin modification.

### Pericentromeric heterochromatin in *S. pombe*

In fission yeast, pericentromeric regions are targeted by siRNAs, resulting in the formation of heterochromatin (Reinhart and Bartel,

## Box 2. Centromere organization

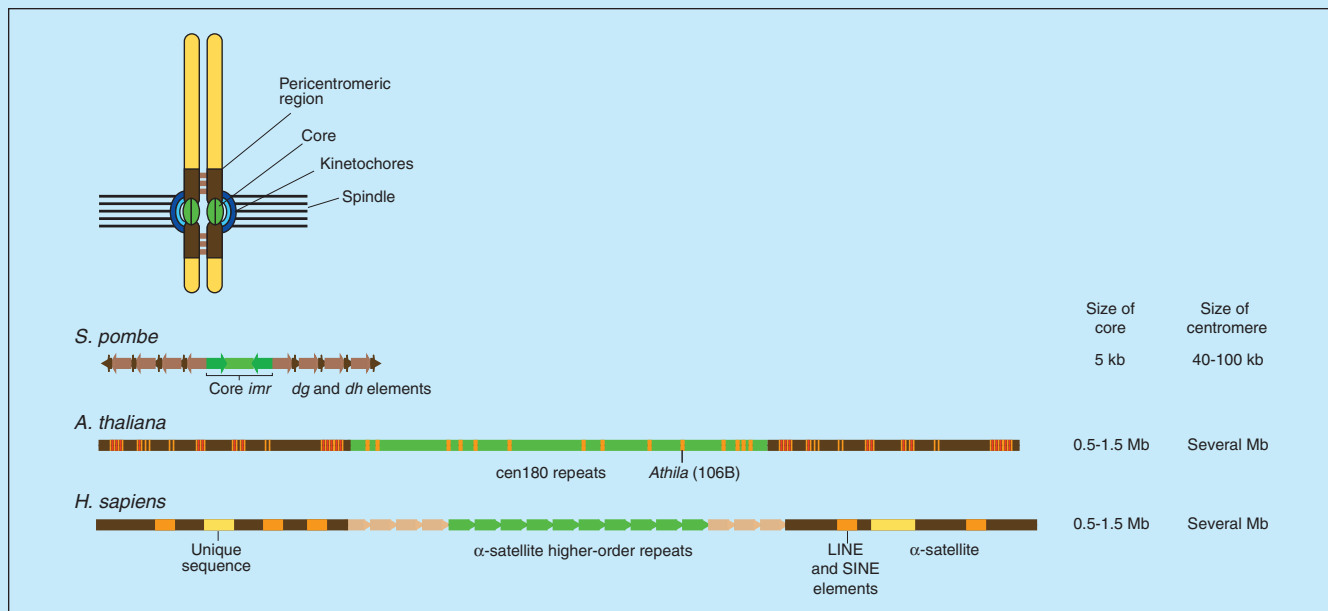

Chromosomes need functional centromeres for reliable segregation during cell division. The functional domains of the centromere are well conserved, although the sequences involved are highly divergent among organisms. The core domain (shown in green in upper figure) – marked by the centromere-specific H3 variant CENP-A – constitutes the platform on which the inner and outer kinetochores (light and dark blue, respectively) are built, and connects the chromatids to the microtubules of the spindle (black). The pericentromeric regions (brown) assist in the loading of CENP-A onto the central core and bind cohesins (which keep sister chromatids together during spindle formation). In addition, they form a rigid heterochromatic structure that helps the chromosome to orient its chromatids in a way that favors bipolar spindle attachment.

The *S. pombe* centromeric core consists of a short conserved core sequence flanked by the inverted inner repeat (*imr*). The pericentromeric region consists of outer repeats, which vary in length between chromosomes and contain alternating *dg* and *dh* elements. No transposon sequences are located in the *S. pombe* centromeric region, although *dg* and *dh* repeats might be derived from ancient transposon remains (Baum et al., 1994; Clarke et al., 1986; Hahnenberger et al., 1991; Kniola et al., 2001; Nakaseko et al., 1986; Partridge et al., 2000). The *A. thaliana* centromeric core region consists primarily of thousands of repeats of a 180 bp element (*cen180*) interspersed with multiple copies and remains of the *Athila* retrotransposon (106B; orange). The pericentromeric region also contains many copies of *Athila* and other retroelements and DNA transposons, as well as stretches of short transposon remains (Copenhaver et al., 1998; Copenhaver et al., 1999; Heslop-Harrison et al., 1999; Kumekawa et al., 2000; Richards et al., 1991). The human centromere consists mainly of  $\alpha$ -satellite repeats. In the central region, these repeats are organized into higher-order repetitive arrays; however, not all of these arrays are occupied by CENP-A, so some of them are actually part of the pericentromeric region. Outside this area, there are monomeric  $\alpha$ -satellite repeats, which are interrupted by blocks of SINE and LINE elements (orange) and some stretches of unique sequence (yellow) (Horvath et al., 2000; Jackson, 2003; Maniatis and Wu, 1978; Schueler and Sullivan, 2006; Spence et al., 2002; Tyler-Smith et al., 1993; Warburton et al., 1997; Wevrick and Willard, 1989; Willard et al., 1983; Yang et al., 1982). *C. elegans* (not shown) is holocentric and therefore many sites along the chromosome act as a centromere and recruit centromeric proteins necessary for segregation. No specific centromeric sequences or nucleating regions have yet been described in worms (Buchwitz et al., 1999; Moore et al., 1999; Oegema et al., 2001).

2002; Volpe et al., 2002) (for reviews, see Martienssen et al., 2005; Verdel et al., 2009). Three interacting protein complexes are involved and together form a self-enhancing amplification loop (Fig. 3A). The first complex involved is the RITS complex, which consists of the Argonaute protein Ago1, the chromodomain protein Chp1 and the self-associating adaptor protein Tas3 (Li et al., 2009). This complex is thought to determine the genomic location of the heterochromatin through association of Ago1 to a locus. The second complex, the RNA-directed RNA polymerase complex (RDRC), contains the RNA-directed RNA polymerase Rdp1, the helicase Hrr1 and the nucleotidyltransferase Cid12 (Motamedi et al., 2004; Verdel et al., 2004). It mediates the amplification of small RNAs from the targeted locus. The third complex is the Clr4-containing complex (CLRC), which establishes the heterochromatic mark.

The effect of targeting pericentromeric repeats by RNAi is twofold. First, transcripts derived from the repeats are degraded by

Dicer and therefore unavailable for translation. This phenomenon is referred to as co-transcriptional gene silencing (CTGS) or *cis*-post-transcriptional gene silencing (*cis*-PTGS). Second, the RITS complex recruits histone deacetylase activity and H3K9 methylation activity, which results in transcriptional gene silencing (TGS) [for recent reviews, see Cam et al. and Moazed (Cam et al., 2009; Moazed, 2009)].

Although paradoxical, transcription from the heterochromatic locus is key to its silencing. Pericentromeric transcripts can be detected biochemically and are recognized by RITS complexes that are preloaded with a pericentromeric siRNA. RITS then recruits RDRC, which brings an RdRP into the vicinity of the transcript, leading to the synthesis of dsRNA on the transcript strand. This dsRNA is processed by Dicer into new siRNAs that can load onto additional RITS complexes, thereby reinforcing the silencing (Colmenares et al., 2007). A second reinforcement loop is

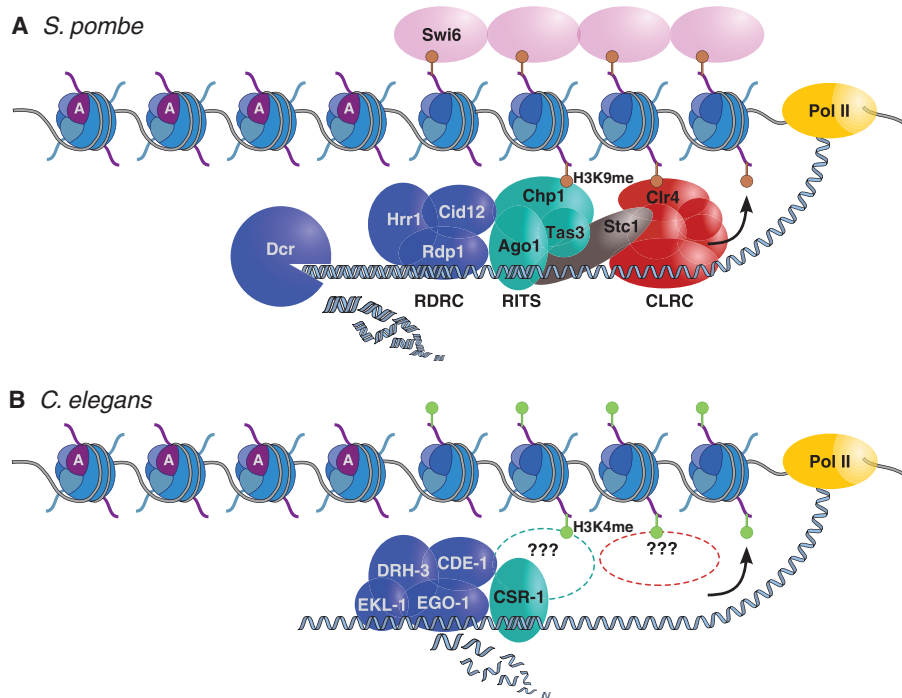

**Fig. 3. Small-RNA-mediated regulation of centromeric chromatin.** The similarities between (A) the *S. pombe* RITS and RDRC complexes and (B) the proteins involved in RNAi and centromere function in *C. elegans* are illustrated. Adapted with permission from Grewal and Elgin (Grewal and Elgin, 2007). (A) Although centromeric repeats are silenced, a low level of transcription by Pol II still occurs. These transcripts are recognized by siRNAs bound to Ago1 in the RITS complex. Together with the RITS complex, RDRC binds to the nascent transcript, bringing the RdRP Rdp1 to the locus. Rdp1 makes new antisense RNA, which is diced into small RNAs by Dicer (Dcr). These small RNAs can again be bound by Ago1, reinforcing binding to the centromeric locus. RITS binds the CLRC through the LIM-domain protein Stc1. The CLRC methylates pericentromeric H3K9, thereby creating a binding site for the Chp1 subunit of RITS. This again strengthens the link between the RITS complex and the centromeric locus. Note that overlap of proteins in the figure does not imply a direct interaction. (B) Although the *S. pombe* and the *C. elegans* protein complexes appear very similar, some clear differences are indicated. First, the *S. pombe* complex synthesizes long dsRNA that is processed by Dicer, whereas in *C. elegans*, Dicer is probably not involved and the RdRP EGO-1 is thought to make shorter single-stranded RNA products. More remarkably, in *S. pombe*, the RITS and RDRC complexes localize to heterochromatic non-coding sequences, whereas the *C. elegans* proteins seem to target genes that are marked by H3K4 methylation. Nevertheless, both complexes might function as boundaries for CENP-A incorporation (indicated by the 'A' in the purple subunit of the nucleosomes). The *C. elegans* proteins or protein complexes that establish the link between the RNAi machinery and H3K4 methylation are currently unknown (indicated by dashed ovals).

established by the histone methylase Clr4, which associates with RITS (Sugiyama et al., 2005; Zhang et al., 2008) via the LIM-domain protein Stc1 (Bayne et al., 2010). Clr4 activity results in H3K9 methylation, which attracts the HP1 homolog Swi6, leading to condensation of the DNA and stabilizing the association of RITS with the locus through binding of Chp1 to modified histone H3. Remarkably, Clr4 is required for the interaction between RITS and RDRC, suggesting that RITS and RDRC might only be able to interact in a heterochromatic context.

Both RITS and RDRC are continuously required to maintain silencing of the pericentromeric region (Volpe et al., 2002) and for pericentromeric structure; mutation of RITS or RDRC components was shown to lead to increased errors in chromosome segregation due to premature loss of centromeric cohesion (Volpe et al., 2003; Win et al., 2006). Nevertheless, two sets of experiments have shown that, in the end, most RNAi factors are dispensable for centromere function. First, the tethering of Tas3 to a locus was shown to cause recruitment of all components required to start an amplification loop and a silencing response (Buhler et al., 2006). This reaction still depends on active RNAi machinery, but bypasses the need for a triggering siRNA. Second, direct tethering of Clr4 to a locus was found to render the entire RNAi machinery dispensable (Kagansky et al., 2009). Therefore, the RNAi

machinery appears to be an elegant way to define heterochromatic pericentromeric domains without the need for sequence conservation (Folco et al., 2008; Ishii et al., 2008). However, in itself it is dispensable for accurate loading of centromere protein A (CENP-A) (see Box 2) and centromere function.

### Organization of holocentromeres in *C. elegans*

Although *C. elegans* chromosomes are holocentric and therefore the centromere function is spread along the entire chromosome, an RNAi-related mechanism similar to the one described for *S. pombe* seems to be in place (Fig. 3B) (Claycomb et al., 2009; Gu et al., 2009; van Wolfswinkel et al., 2009). More specifically, an RdRP (EGO-1) interacts with a nucleotidyltransferase (CDE-1) and a helicase (DRH-3), possibly indicating the presence of an RDRC-like complex. In terms of a RITS-like complex, only the core protein, the Argonaute CSR-1, is currently known to interact with the RDRC-like complex in *C. elegans*, but it is likely that a chromatin-binding protein is also involved in RNAi-directed chromatin modification. In fact, several such proteins were identified in a screen that also identified CDE-1 and CSR-1 (Robert et al., 2005), although none of these proteins has yet been found to interact with CSR-1 or with any of the other centromeric RNAi proteins.

Similar to the situation in *S. pombe*, loss of any of the above-mentioned proteins results in severe chromosomal mis-segregation in *C. elegans*. Remarkably, however, the regions targeted by the *C. elegans* RITS- and RDRC-like complexes seem to be coding regions and not repetitive sequences, as in *S. pombe*. Consequently, instead of overlapping with H3K9 methylation, CSR-1 localization corresponds to regions that are H3K4-methylation enriched. As *C. elegans* chromosomes are holocentric and no conserved centromeric sequence is known, it is currently unknown whether the coding regions function as the pericentromeric sequence in *C. elegans* or whether another centromeric organization is in place. It is tempting to speculate that *C. elegans* uses the presence of active genes in DNA as a mark that the DNA must be reliably segregated during cell division.

### Satellite centromeres in plants and mammals

In many organisms, centromeric domains are less well defined than in *S. pombe*. Both human and *Arabidopsis* centromeres, for example, consist of long stretches of satellite repeats, some of which belong to the centromere core domain and some to the pericentromeric region (see Box 2).

*Arabidopsis* pericentromeric repeats are transcribed and siRNAs derived from these sequences are abundant. Moreover, increased levels of siRNAs are associated with hypermethylation of centromeric DNA (Chen, M. et al., 2008). Two types of repeats (cen180 and the *Athila*-transposon-derived 106B) are most prominent in the *Arabidopsis* centromeric region and, interestingly, they appear to be silenced by two different mechanisms.

Cen180 repeats are H3K9 methylated, which requires the histone methyltransferase KYP. The biogenesis of siRNAs derived from cen180 repeats depends on RDR2, DCL3, DDM1 and probably an Argonaute, although it has not yet been identified. Mutation of RDR2, DCL3 or DDM1 results in the absence of cen180-repeat-derived siRNAs, but has no effect on H3K9 methylation of the corresponding loci, suggesting that an RNAi-independent silencing mechanism must be at work to maintain silencing of cen180 repeats.

The 106B repeats are also H3K9 methylated and are targeted by siRNAs. The biogenesis of siRNAs derived from these repeats is dependent on RDR2 and DCL3, but not on DDM1. In this case, the Argonaute involved is known to be AGO1 (May et al., 2005). This difference in requirements for siRNA production between cen180 and 106B repeats is probably due to the fact that production of the 106B-repeat-derived siRNAs appears to be initiated from adjacent long terminal repeat (LTR) transposons. Interestingly, loss of AGO1 results in reduced levels of H3K9 methylation at the pericentromeric region, suggesting that 106B-repeat-derived siRNAs are causal to the histone modifications.

Together, the current data suggest that cen180 repeats are constitutively silenced by an RNAi-independent mechanism, whereas 106B repeats are silenced de novo, which requires the small-RNA trigger. How this relates to the presence of siRNAs from the cen180 repeats is not entirely clear, but it is possible that these siRNAs are a consequence of the silencing, rather than a cause. Moreover, no defects in centromere function have yet been attributed to small-RNA-related events; therefore, the functional relevance of centromeric siRNAs in *Arabidopsis* is not entirely clear.

Human centromeres can span several megabases of sequence and consist primarily of  $\alpha$ -satellite repeats. Much of this repeat sequence can be deleted without interrupting centromere function,

but formation of de novo centromeres is most efficient on these specific satellite stretches (Harrington et al., 1997; Ikeno et al., 1998). Human centromeric regions are also associated with H3K9 methylation (Rosenfeld et al., 2009) and RNA has been shown to play a role in kinetochore integrity during mitosis (Chueh et al., 2009; Wong et al., 2007). It has been suggested that artificially introduced siRNAs can induce H3K9 methylation (Kim et al., 2006; Weinberg et al., 2006) and that this might be followed by DNA methylation (Hawkins et al., 2009; Morris et al., 2004), although additional studies are required to confirm these observations. Moreover, the formation of neocentromeres on a human chromosome was shown to require the presence of Dicer (Fukagawa et al., 2004). Together, these observations suggest that small RNAs are in some way involved in mammalian centromeric chromatin, but none of the molecular steps involved has yet been identified. It is possible that small RNAs are mainly involved in the initial establishment of centromere function, as reflected by neocentromere formation. In this context, it would be interesting to evaluate the role of small RNAs in the segregation of the equine chromosome 11. This chromosome has an evolutionarily young centromere that is devoid of centromeric satellites (Wade et al., 2009), raising the possibility that it relies more heavily on small RNAs for its structure and function.

### Meiotic silencing of unpaired chromatin

Unpaired chromatin can induce checkpoint activation during meiosis. In species in which sex is determined by sex chromosomes, one of the sexes generally contains a chromosome that is unable to pair with a perfect homolog and therefore poses a threat to meiotic progression. In mammals, these chromosomes are silenced and form a highly condensed sex body.

Many lines of evidence link meiotic silencing of unpaired chromatin (MSUC) to small-RNA-mediated silencing. In the filamentous fungus *Neurospora*, any region of a chromosome that is unable to pair, or shows less than 95% identity to its pairing partner, is silenced by H3K9 methylation during meiosis (Pratt et al., 2004; Shiu et al., 2001). This silencing mechanism requires the RdRP Sad-1, the Argonaute Sms-2 and the Dicer-like protein Sms-3 (Alexander et al., 2008; Lee et al., 2003), strongly indicating that this mechanism is related to RNAi, although the involvement of small RNAs in this process has not yet been shown.

Most other organisms apply less stringent inspection of their genome during meiosis, although unpaired sex chromosomes are usually distinguished from the pairing autosomes. In mammals, the sex chromosomes in males are H3K9 methylated and separated from the autosomes in a region referred to as the sex body (Khalil et al., 2004; Monesi, 1965). The HMG-box protein Maelstrom was found to localize to the sex body, as well as to other unsynapsed chromosomal regions (Costa et al., 2006), and is also linked to the piRNA pathway in both mouse and *Drosophila* (Findley et al., 2003; Soper et al., 2008). This suggests that MSUC might be connected to small RNAs in animals as well. However, in addition to the H3K9me2 mark, chromatin of the sex body retains several marks associated with double-stranded breaks (DSBs) (Handel, 2004; Mahadevaiah et al., 2001). Several proteins that are involved in crossover formation and DSB repair (including BRCA1 and ATR) are also involved in MSUC in mouse (Baarends et al., 2005; Turner et al., 2004; Turner et al., 2005). Moreover, part of the induction of MSUC seems to be triggered by the presence, or possibly the longer persistence, of unrepaired DNA breaks on unsynapsed chromosomes (Mahadevaiah et al., 2008;



Schoenmakers et al., 2008). As the piRNA pathway is involved in transposon silencing and therefore affects the occurrence of DSBs, further analysis will be required to dissect the contribution of small RNAs to MSUC in mouse. In this light, it is interesting to mention a recent finding in *Neurospora*, which concerns a novel class of small RNAs, named qiRNAs (Lee et al., 2009). These small RNAs were found to be associated with DNA damage and were suggested to play a role in downregulating protein synthesis upon induction of DNA damage, but they might, in addition, play a role in meiotic silencing.

In *C. elegans*, the unpaired male X chromosome is also marked by H3K9 methylation and is condensed into a compact body during the pachytene stage of meiosis (Bean et al., 2004), similar to the mammalian sex body. The presence of the H3K9 mark is related to synapsis; in a *him-8* mutant, which has an X-chromosome-specific pairing defect, both hermaphrodite X chromosomes are marked (Bean et al., 2004). Interestingly, the zinc-finger protein HIM-17, which functions in concert with the meiotic recombination protein SPO-11 to create DSBs during crossover formation, is required for MSUC in *C. elegans* (Reddy and Villeneuve, 2004), again supporting a connection between MSUC and meiotic DSB formation. The presence of SPO-11 itself, however, is not required, indicating that it is not the meiotic DSBs themselves that are essential for MSUC.

Genetic data suggest that *C. elegans* MSUC is also closely related to mechanisms involving small RNA. Mutation of the RdRP EGO-1 results in the absence of the silencing mark (Maine et al., 2005), suggesting a parallel between the mechanisms of MSUC in *C. elegans* and in *Neurospora*. The other RDRC- and RITS-like proteins introduced above are also involved. In contrast to the loss of EGO-1, however, loss of any of these other proteins (CSR-1, DRH-3, EKL-1 and CDE-1) leads to ectopic H3K9 methylation, whereas synapsis is not affected [(She et al., 2009); J.C.W. and R.F.K., unpublished data]. This suggests that the RDRC- and RITS-like proteins are required to keep the EGO-1 amplification localized and focused. However, a double mutant consisting of any of these genes combined with *ego-1* retains the ectopic H3K9 methylation, showing that the methylation mark can be formed in the absence of EGO-1 (She et al., 2009). It therefore seems that two different pathways – a DSB-related pathway and an EGO-1-centered pathway – interact to determine the localization of H3K9 methylation. An intriguing possibility is that, on one side, DSB remains trigger H3K9 methylation, possibly mediated by small RNAs. On the other side, H3K9 methylation can be expelled from the autosomes by the siRNAs made by EGO-1, through the CSR-1 pathway (Fig. 4). Further analysis of MSUC in *C. elegans* will be required to test this hypothesis and reconcile all observations, possibly allowing us to obtain new insights that can be extended to the mechanism of MSUC in mammals.

### Paramutation

An enigmatic phenomenon known as paramutation has been the subject of investigation in plants for many decades. In paramutation, an expressed naive allele (the paramutable allele) can be modified into a silenced paramutated allele through interaction in a heterozygous situation with a paramutagenic allele. The paramutated allele is typically stable and inheritable, and is paramutagenic when placed in a heterozygous situation with a paramutable allele. Importantly, no sequence changes are involved in the shift from paramutable to paramutated allele – the effect is

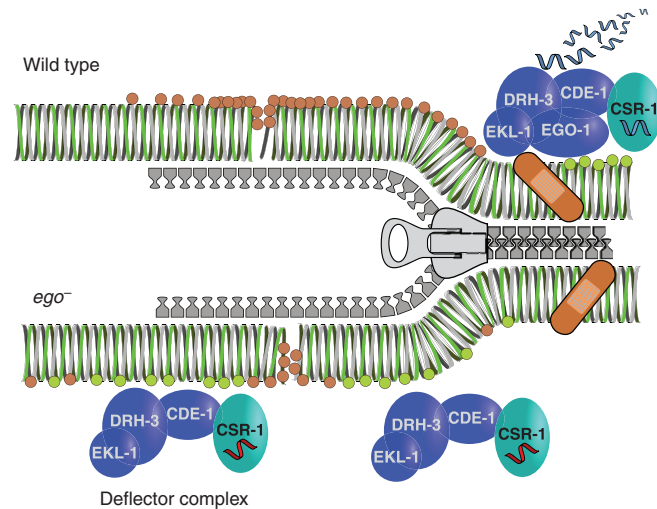

**Fig. 4. A hypothesis for the processes that might play a role in MSUC in *C. elegans*.** We propose that silencing of unpaired chromatin relies on exclusion of the silencing mark from synapsed regions (indicated by a zipper), rather than specific deposition on unsynapsed regions. The RITS- and RDRC-like proteins CSR-1, CDE-1, DRH-3 and EKL-1 might form the complex that mediates this 'deflector' activity. The initiation of H3K9 methylation (brown circles) might be independent of both small RNAs and synapsis and could, for example, be triggered by the presence of DSBs (indicated by gaps in the helix) or DSB remains (indicated by 'band-aids'). The 'deflector complex', loaded with EGO-1-produced siRNAs, could function to keep H3K9 methylation away from synapsed regions, either by erasing the H3K9 methylation mark or by deposition of a different mark that excludes H3K9 methylation (green circles). Loss of any of the proteins of the deflector complex would result in a non-functional deflector complex and would thereby spread the H3K9 methylation mark to synapsed regions (not shown). When EGO-1 is lost (as shown in the lower part of the figure), the deflector complex might take on other small RNAs that mislocalize the deflector activity. This could result in deflection of H3K9 methylation from the whole genome, including the unsynapsed regions. Upon additional loss of any of the deflector complex components, the complex would become inactive and H3K9 methylation could spread again.

purely epigenetic. Several examples of paramutable loci have been described in maize, including the *b1* locus, which regulates the synthesis of the anthocyanin pigment. The paramutable B-I allele is transcriptionally active and results in dark pigmentation. When crossed to the light-pigmented paramutagenic B' allele, all progeny have light pigmentation, and crossing of the first filial (F1) generation to new naive B-I again leads to a completely light-pigmented F2 generation. Interestingly, the sequence that causes this effect is a repetitive region located ~100 kb upstream of the *b1* locus. The strength of the effect correlates with the number of repeats (Stam et al., 2002a; Stam et al., 2002b). In contrast to the typical situation in other systems, the repetitive region associated with the active B-I allele is hypermethylated but open, whereas in the silenced B' allele, DNA methylation is reduced and the chromatin is compacted. Repetitive or transposon-related sequences also play an important role at other paramutable loci, although the exact organization varies considerably.

There are several indications that an RNA intermediate is involved in paramutation. The repetitive region upstream of the *b1* locus is subject to bidirectional transcription, and the RdRP

MOP1 is required for paramutation at this locus and several other loci in maize (Alleman et al., 2006; Dorweiler et al., 2000). In addition, at the paramutable *p11* locus, it was found that a homolog of the previously mentioned DRD1 chromatin factor, RMR1, and Pol IV are involved (Erhard et al., 2009; Hale et al., 2007; Hollick and Chandler, 2001; Sidorenko et al., 2009), suggesting a mechanism related to that of transposon silencing in *Arabidopsis*.

Paramutation is probably not limited to plants; similar phenomena have been described in mouse involving the *agouti* locus, a manipulated version of the imprinted *Rasgrfl* locus and the LacZ-inserted *Kit* locus (for reviews, see Chandler, 2007; Cuzin et al., 2008). In the case of the *Kit* locus, a role for a small-RNA intermediate has been suggested (Rassoulzadegan et al., 2006). In humans, several epimutations with some degree of non-Mendelian inheritance have been identified, including a hereditary non-polyposis colorectal cancer (HNPCC)-associated *MLH1* epimutation (Hitchins et al., 2007).

It is too early to propose a unifying mechanism for these diverse observations, but it is tempting to speculate that heritable gene-silencing events triggered by repetitive sequences or by other small-RNA-generating regions occur in all eukaryotic organisms. Although examples in animals are currently rare and enigmatic, it is notable that small-RNA-mediated silencing events discovered in one branch of the eukaryotic tree have, in multiple cases, been found to exist in other branches as well. Therefore, it is likely that phenomena similar to paramutation will also eventually be found to occur in humans.

### DNA elimination in ciliates

The regulatory potential of small RNAs is not limited to chromatin modification, but can involve more drastic effects. The ciliates *Tetrahymena* and *Paramecium* exhibit an extreme level of small-RNA-mediated silencing, involving the elimination of entire transposable and repetitive elements from their active 'somatic' genomes (Fig. 5) [for a recent review, see Duhaucourt et al. (Duhaucourt et al., 2009)].

Ciliates are characterized by the presence of two types of nuclei in a unicellular organism: a transcriptionally inactive diploid micronucleus, which represents the germ line, and an active polyploid macronucleus, which functions as soma. The macronucleus hosts gene expression during the vegetative state, but is lost during sexual reproduction, after which it is replaced by a macronucleus that is newly formed from the zygotic micronucleus. Elimination of micronucleus-specific sequences from the macronucleus is mediated by a special class of small RNA named scanRNAs. The 25-30-nucleotide scanRNAs are synthesized during meiosis from the entire micronuclear genome and associate with Piwi-like Argonaute proteins. Also during meiosis, long non-coding transcripts (ncRNAs) are synthesized from the entire maternal macronuclear genome. Interactions between the scanRNAs and the ncRNAs result in the elimination of all scanRNAs that recognize a target, leaving only the micronucleus-specific scanRNAs. Upon formation of a new zygotic macronucleus, these remaining scanRNAs identify the micronucleus-specific sequences, which are then marked by H3K9 methylation (Liu et al., 2004; Liu et al., 2007; Taverna et al., 2002)

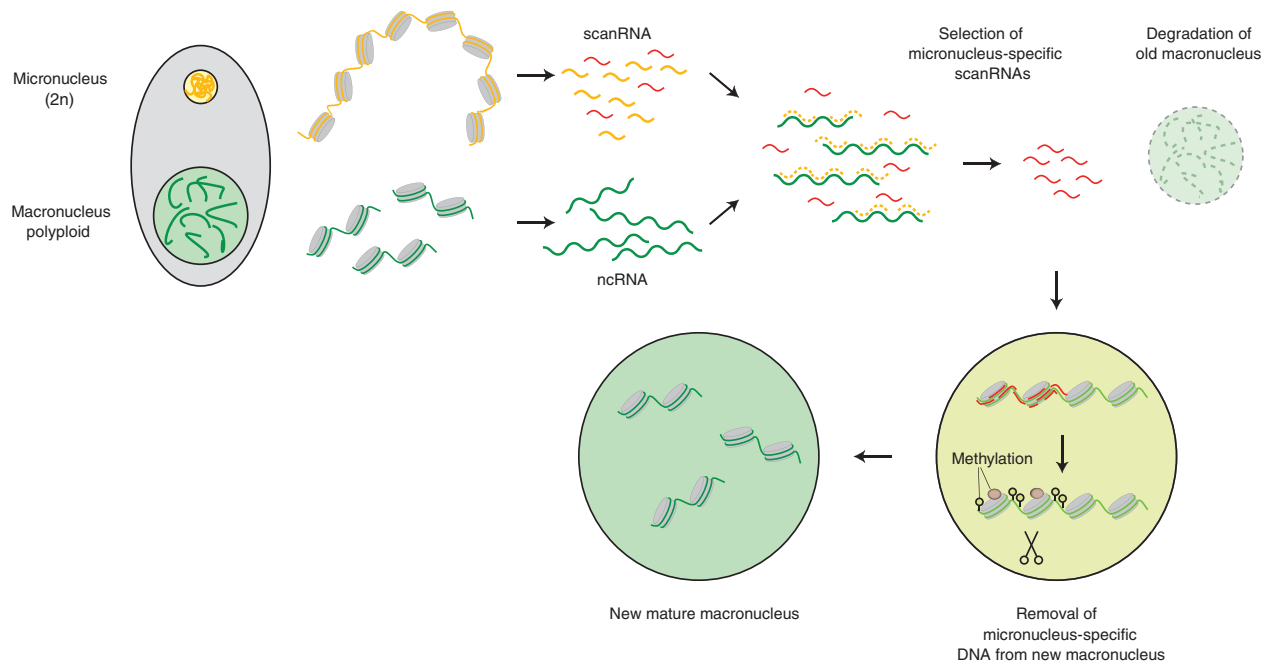

**Fig. 5. DNA elimination in ciliates.** The quiescent micronucleus contains the intact diploid genome, whereas the macronucleus is transcriptionally active and contains only fragments of the genome. In the event of sexual reproduction, the macronucleus is lost. The micronucleus goes through meiosis, fuses with another haploid micronucleus and produces a new zygotic macronucleus from which specific regions (mostly transposon-related sequences) are again removed. The genome-scanning model shown here explains the selection of these regions. During meiosis, the micronucleus produces scanRNAs of its entire genome and the entire old macronuclear genome is transcribed into non-coding transcripts (green). scanRNAs that recognize macronuclear transcripts (yellow) are removed from the pool and the remaining micronucleus-specific scanRNAs (red) enter the new zygotic macronucleus to mark the micronucleus-specific sequences. The identified regions are methylated (brown and black marks) and are removed from the macronuclear genome. The remaining genomic fragments acquire new telomeres, resulting in stable and transcriptionally active chromosomal fragments.

and eliminated by a specific endonuclease. Histone modification is thought to guide DNA elimination (Taverna et al., 2002), although the precision of sequence excision in *Paramecium* exceeds the nucleosome scale, suggesting that H3K9 methylation only assists in recruiting the endonuclease to the target site. The scanRNAs are required both for the establishment of histone modifications and for DNA elimination, and are therefore thought to induce DNA elimination (Malone et al., 2005; Mochizuki and Gorovsky, 2005).

DNA elimination allows ciliates to control transposable elements – eliminating them from their active genomes limits the opportunity for them to ‘jump’. Although this type of communication between two nuclei within the same cell is unique to ciliates, some level of interaction between somatic and germ-line nuclei has also been observed in multicellular organisms. In *Arabidopsis*, the pollen vegetative nucleus produces high levels of transposon-directed siRNAs that are subsequently loaded into the mature sperm, thereby protecting the future zygote against transposition (Slotkin et al., 2009). Also, in *Drosophila*, the zygote is protected by somatic parental contribution of small RNA (Brennecke et al., 2008; Malone et al., 2009). These examples indicate that the principle of small-RNA crosstalk between different nuclei and cells might be a widely used concept in genome protection.

### The paradox of active heterochromatin

In many of the mechanisms discussed thus far, small RNAs are derived from heterochromatic sequences and play a role in maintaining these regions in an inactive state. To produce small RNAs, however, these heterochromatic regions need to be transcribed. Moreover, target recognition by small RNAs is also thought to occur on nascent RNA rather than on DNA, implying that these loci cannot be completely inactive. In *Arabidopsis*, silenced transposable elements are transcribed by the specialized polymerases Pol IV and Pol V, suggesting that transcription of heterochromatin requires special features of a polymerase. These two plant-specific polymerases were identified as early duplications of the major Pol II subunit (Luo and Hall, 2007). Although specialized polymerases have not yet been identified in animals or fungi, the involvement of Pol II subunits in heterochromatin maintenance is more widespread. In *S. pombe*, the transcription of pericentromeric heterochromatin was found to require several Pol II subunits (Djupedal et al., 2005; Kato et al., 2005). In *Drosophila*, interaction between Pol II subunits and the RNAi machinery was detected (Kavi and Birchler, 2009). This opens up the possibility that Pol II variants might exist in other eukaryotes that establish the same effect as Pol IV and Pol V in plants.

This paradoxical activity of heterochromatin indicates that the distinction between heterochromatin and euchromatin is far from black and white, and that heterochromatin might be more dynamic than we had anticipated. *S. pombe* centromeric transcription and heterochromatin were indeed found to be dynamically regulated throughout the cell cycle (Chen, E. S. et al., 2008; Kloc et al., 2008). During mitosis and G1 phase, the heterochromatin protein Swi6 is progressively lost from the chromatin, allowing temporary transcription of pericentromeric regions. As a result, pericentromeric transcripts accumulate during S phase and are rapidly processed into siRNAs to re-establish heterochromatin and cohesin patterns for the next division.

A recent finding in *Drosophila* has also suggested that different variants of HP1 are used to mark the transcriptional activity of different heterochromatic regions (Klattenhoff et al., 2009). The germline-specific HP1 variant Rhino was found to localize to a

piRNA locus, replacing the generic HP1, and is required for piRNA production from that locus. Although it is currently not known whether this finding extends to all piRNA loci or whether this mechanism is conserved in other species, it indicates that heterochromatin comes in different flavors and that more nuances in heterochromatin activity are to be expected.

### Concluding remarks

The examples discussed here clearly indicate that small RNAs can have direct effects on chromatin. Phenomena involving the regulation of chromatin by small non-coding RNAs are widespread and very diverse. Different classes of small RNAs can mediate chromatin modification and organisms can use different molecular solutions to obtain a similar biological result. The abundance of small RNAs suggests that additional new classes and subclasses of small RNAs will probably be discovered in the future. It is possible that these discoveries will shed light on even more chromatin-modifying mechanisms or help to detangle pathways for phenomena that currently are enigmatic.

Although different types of sequences can be targeted by small-RNA-mediated silencing mechanisms, it is generally a property of the targeted sequence (e.g. repetitiveness or pairing), rather than the nucleotide sequence itself, that triggers the response. This, in a nutshell, is the unique capacity of small-RNA-mediated regulation: the ability to modulate sequences using an operational definition. Sequences that need to be silenced are defined based on their properties, and the relevant small RNAs can be produced and/or stabilized ‘on the fly’. In many instances, small-RNA-based mechanisms seem to initiate rather than maintain a specific form of chromatin, suggesting that, when maintenance mechanisms fail or are actively evaded, small RNAs are there to reinitiate the required chromatin state. Small RNAs therefore constitute a true genome-surveillance mechanism.

### References

- Alexander, W. G., Raju, N. B., Xiao, H., Hammond, T. M., Perdue, T. D., Metzberg, R. L., Pukkila, P. J. and Shiu, P. K. (2008). DCL-1 colocalizes with other components of the MSUD machinery and is required for silencing. *Fungal Genet. Biol.* **45**, 719–727.
- Alleman, M., Sidorenko, L., McGinnis, K., Seshadri, V., Dorweiler, J. E., White, J., Sikkink, K. and Chandler, V. L. (2006). An RNA-dependent RNA polymerase is required for paramutation in maize. *Nature* **442**, 295–298.
- Aravin, A. A., Naumova, N. M., Tulin, A. V., Vagin, V. V., Rozovsky, Y. M. and Gvozdev, V. A. (2001). Double-stranded RNA-mediated silencing of genomic tandem repeats and transposable elements in the *D. melanogaster* germline. *Curr. Biol.* **11**, 1017–1027.
- Aravin, A., Gaidatzis, D., Pfeffer, S., Lagos-Quintana, M., Landgraf, P., Iovino, N., Morris, P., Brownstein, M. J., Kuramochi-Miyagawa, S., Nakano, T. et al. (2006). A novel class of small RNAs bind to MILI protein in mouse testes. *Nature* **442**, 203–207.
- Aravin, A. A., Sachidanandam, R., Girard, A., Fejes-Toth, K. and Hannon, G. J. (2007). Developmentally regulated piRNA clusters implicate MILI in transposon control. *Science* **316**, 744–747.
- Aravin, A. A., Sachidanandam, R., Bourc’his, D., Schaefer, C., Pezic, D., Toth, K. F., Bestor, T. and Hannon, G. J. (2008). A piRNA pathway primed by individual transposons is linked to de novo DNA methylation in mice. *Mol. Cell* **31**, 785–799.
- Baarends, W. M., Wassenaar, E., van der Laan, R., Hoogerbrugge, J., Sleddens-Linkels, E., Hoeijmakers, J. H., de Boer, P. and Grootegeed, J. A. (2005). Silencing of unpaired chromatin and histone H2A ubiquitination in mammalian meiosis. *Mol. Cell Biol.* **25**, 1041–1053.
- Baulcombe, D. C. (2007). Molecular biology. Amplified silencing. *Science* **315**, 199–200.
- Baum, M., Ngan, V. K. and Clarke, L. (1994). The centromeric K-type repeat and the central core are together sufficient to establish a functional Schizosaccharomyces pombe centromere. *Mol. Biol. Cell* **5**, 747–761.
- Bayne, E. H., White, S. A., Kagansky, A., Bijos, D. A., Sanchez-Pulido, L., Hoe, K. L., Kim, D. U., Park, H. O., Ponting, C. P., Rappaport, J. et al. (2010). Stc1: a critical link between RNAi and chromatin modification required for heterochromatin integrity. *Cell* **140**, 666–677.
- Bean, C. J., Schaner, C. E. and Kelly, W. G. (2004). Meiotic pairing and imprinted X chromatin assembly in *Caenorhabditis elegans*. *Nat. Genet.* **36**, 100–105.
- Bourc’his, D. and Bestor, T. H. (2004). Meiotic catastrophe and retrotransposon reactivation in male germ cells lacking Dnmt3L. *Nature* **431**, 96–99.



- Brennecke, J., Aravin, A. A., Stark, A., Dus, M., Kellis, M., Sachidanandam, R. and Hannon, G. J. (2007). Discrete small RNA-generating loci as master regulators of transposon activity in *Drosophila*. *Cell* **128**, 1089-1103.
- Brennecke, J., Malone, C. D., Aravin, A. A., Sachidanandam, R., Stark, A. and Hannon, G. J. (2008). An epigenetic role for maternally inherited piRNAs in transposon silencing. *Science* **322**, 1387-1392.
- Brower-Toland, B., Findley, S. D., Jiang, L., Liu, L., Yin, H., Dus, M., Zhou, P., Elgin, S. C. and Lin, H. (2007). *Drosophila* PIWI associates with chromatin and interacts directly with HP1a. *Genes Dev.* **21**, 2300-2311.
- Buchwitz, B. J., Ahmad, K., Moore, L. L., Roth, M. B. and Henikoff, S. (1999). A histone-H3-like protein in *C. elegans*. *Nature* **401**, 547-548.
- Buhler, M., Verdel, A. and Moazed, D. (2006). Tethering RITS to a nascent transcript initiates RNAi- and heterochromatin-dependent gene silencing. *Cell* **125**, 873-886.
- Cam, H. P., Chen, E. S. and Grewal, S. I. (2009). Transcriptional scaffolds for heterochromatin assembly. *Cell* **136**, 610-614.
- Cao, X. and Jacobsen, S. E. (2002). Role of the Arabidopsis DRM methyltransferases in de novo DNA methylation and gene silencing. *Curr. Biol.* **12**, 1138-1144.
- Carmell, M. A., Girard, A., van de Kant, H. J., Bourc'his, D., Bestor, T. H., de Rooij, D. G. and Hannon, G. J. (2007). MIWI2 is essential for spermatogenesis and repression of transposons in the mouse male germline. *Dev. Cell* **12**, 503-514.
- Chan, S. W., Zilberman, D., Xie, Z., Johansen, L. K., Carrington, J. C. and Jacobsen, S. E. (2004). RNA silencing genes control de novo DNA methylation. *Science* **303**, 1336.
- Chan, S. W., Henderson, I. R., Zhang, X., Shah, G., Chien, J. S. and Jacobsen, S. E. (2006). RNAi, DRD1, and histone methylation actively target developmentally important non-CG DNA methylation in Arabidopsis. *PLoS Genet.* **2**, e83.
- Chandler, V. L. (2007). Paramutation: from maize to mice. *Cell* **128**, 641-645.
- Chen, E. S., Zhang, K., Nicolas, E., Cam, H. P., Zofall, M. and Grewal, S. I. (2008). Cell cycle control of centromeric repeat transcription and heterochromatin assembly. *Nature* **451**, 734-737.
- Chen, M., Ha, M., Lackey, E., Wang, J. and Chen, Z. J. (2008). RNAi of met1 reduces DNA methylation and induces genome-specific changes in gene expression and centromeric small RNA accumulation in Arabidopsis allopolyploids. *Genetics* **178**, 1845-1858.
- Chueh, A. C., Northrop, E. L., Brettingham-Moore, K. H., Choo, K. H. and Wong, L. H. (2009). LINE retrotransposon RNA is an essential structural and functional epigenetic component of a core neocentromeric chromatin. *PLoS Genet.* **5**, e1000354.
- Chung, W. J., Okamura, K., Martin, R. and Lai, E. C. (2008). Endogenous RNA interference provides a somatic defense against *Drosophila* transposons. *Curr. Biol.* **18**, 795-802.
- Clarke, L., Amstutz, H., Fishel, B. and Carbon, J. (1986). Analysis of centromeric DNA in the fission yeast *Schizosaccharomyces pombe*. *Proc. Natl. Acad. Sci. USA* **83**, 8253-8257.
- Claycomb, J. M., Batista, P. J., Pang, K. M., Gu, W., Vasale, J. J., van Wolfswinkel, J. C., Chaves, D. A., Shirayama, M., Mitani, S., Ketting, R. F. et al. (2009). The Argonaute CSR-1 and its 22G-RNA cofactors are required for holocentric chromosome segregation. *Cell* **139**, 123-134.
- Cokus, S. J., Feng, S., Zhang, X., Chen, Z., Merriman, B., Haudenschild, C. D., Pradhan, S., Nelson, S. F., Pellegrini, M. and Jacobsen, S. E. (2008). Shotgun bisulphite sequencing of the Arabidopsis genome reveals DNA methylation patterning. *Nature* **452**, 215-219.
- Colmenares, S. U., Buker, S. M., Buhler, M., Dlakic, M. and Moazed, D. (2007). Coupling of double-stranded RNA synthesis and siRNA generation in fission yeast RNAi. *Mol. Cell* **27**, 449-461.
- Copenhaver, G. P., Browne, W. E. and Preuss, D. (1998). Assaying genome-wide recombination and centromere functions with Arabidopsis tetrads. *Proc. Natl. Acad. Sci. USA* **95**, 247-252.
- Copenhaver, G. P., Nickel, K., Kuromori, T., Benito, M. I., Kaul, S., Lin, X., Bevan, M., Murphy, G., Harris, B., Parnell, L. D. et al. (1999). Genetic definition and sequence analysis of Arabidopsis centromeres. *Science* **286**, 2468-2474.
- Costa, Y., Speed, R. M., Gautier, P., Semple, C. A., Maratou, K., Turner, J. M. and Cooke, H. J. (2006). Mouse MAELSTROM: the link between meiotic silencing of unsynapsed chromatin and microRNA pathway? *Hum. Mol. Genet.* **15**, 2324-2334.
- Cuzin, F., Grandjean, V. and Rassoulzadegan, M. (2008). Inherited variation at the epigenetic level: paramutation from the plant to the mouse. *Curr. Opin. Genet. Dev.* **18**, 193-196.
- Czech, B., Malone, C. D., Zhou, R., Stark, A., Schlingehayde, C., Dus, M., Perrimon, N., Kellis, M., Wohlschlegel, J. A., Sachidanandam, R. et al. (2008). An endogenous small interfering RNA pathway in *Drosophila*. *Nature* **453**, 798-802.
- Daxinger, L., Kanno, T., Bucher, E., van der Winden, J., Naumann, U., Matzke, A. J. and Matzke, M. (2009). A stepwise pathway for biogenesis of 24-nt secondary siRNAs and spreading of DNA methylation. *EMBO J.* **28**, 48-57.
- Ding, Y., Wang, X., Su, L., Zhai, J., Cao, S., Zhang, D., Liu, C., Bi, Y., Qian, Q., Cheng, Z. et al. (2007). SDG714, a histone H3K9 methyltransferase, is involved in Tos17 DNA methylation and transposition in rice. *Plant Cell* **19**, 9-22.
- Djupedal, I., Portoso, M., Spahr, H., Bonilla, C., Gustafsson, C. M., Allshire, R. C. and Ekvall, K. (2005). RNA Pol II subunit Rpb7 promotes centromeric transcription and RNAi-directed chromatin silencing. *Genes Dev.* **19**, 2301-2306.
- Dorweiler, J. E., Carey, C. C., Kubo, K. M., Hollick, J. B., Kermicle, J. L. and Chandler, V. L. (2000). mediator of paramutation1 is required for establishment and maintenance of paramutation at multiple maize loci. *Plant Cell* **12**, 2101-2118.
- Duharcourt, S., Lepere, G. and Meyer, E. (2009). Developmental genome rearrangements in ciliates: a natural genomic subtraction mediated by non-coding transcripts. *Trends Genet.* **25**, 344-350.
- Ender, C. and Meister, G. (2010). Argonaute proteins at a glance. *J. Cell Sci.* **123**, 1819-1823.
- Erhard, K. F., Jr, Stonaker, J. L., Parkinson, S. E., Lim, J. P., Hale, C. J. and Hollick, J. B. (2009). RNA polymerase IV functions in paramutation in *Zea mays*. *Science* **323**, 1201-1205.
- Findley, S. D., Tamanaha, M., Clegg, N. J. and Ruohola-Baker, H. (2003). Maelstrom, a *Drosophila* spindle-class gene, encodes a protein that colocalizes with Vasa and RDE1/AGO1 homolog, Aubergine, in nuage. *Development* **130**, 859-871.
- Fire, A., Xu, S., Montgomery, M. K., Kostas, S. A., Driver, S. E. and Mello, C. C. (1998). Potent and specific genetic interference by double-stranded RNA in *Caenorhabditis elegans*. *Nature* **391**, 806-811.
- Folco, H. D., Pidoux, A. L., Urano, T. and Allshire, R. C. (2008). Heterochromatin and RNAi are required to establish CENP-A chromatin at centromeres. *Science* **319**, 94-97.
- Fukagawa, T., Nogami, M., Yoshikawa, M., Ikeno, M., Okazaki, T., Takami, Y., Nakayama, T. and Oshimura, M. (2004). Dicer is essential for formation of the heterochromatin structure in vertebrate cells. *Nat. Cell. Biol.* **6**, 784-791.
- Gendrel, A. V., Lippman, Z., Yordan, C., Colot, V. and Martienssen, R. A. (2002). Dependence of heterochromatic histone H3 methylation patterns on the Arabidopsis gene DDM1. *Science* **297**, 1871-1873.
- Ghildiyal, M., Seitz, H., Horwich, M. D., Li, C., Du, T., Lee, S., Xu, J., Kittler, E. L., Zapp, M. L., Weng, Z. et al. (2008). Endogenous siRNAs derived from transposons and mRNAs in *Drosophila* somatic cells. *Science* **320**, 1077-1081.
- Girard, A., Sachidanandam, R., Hannon, G. J. and Carmell, M. A. (2006). A germline-specific class of small RNAs binds mammalian Piwi proteins. *Nature* **442**, 199-202.
- Grewal, S. I. and Elgin, S. C. (2007). Transcription and RNA interference in the formation of heterochromatin. *Nature* **447**, 399-406.
- Gu, W., Shirayama, M., Conte, D., Jr, Vasale, J., Batista, P. J., Claycomb, J. M., Moresco, J. J., Youngman, E. M., Keys, J., Stoltz, M. J. et al. (2009). Distinct argonaute-mediated 22G-RNA pathways direct genome surveillance in the *C. elegans* germline. *Mol. Cell* **36**, 231-244.
- Gunawardane, L. S., Saito, K., Nishida, K. M., Miyoshi, K., Kawamura, Y., Nagami, T., Siomi, H. and Siomi, M. C. (2007). A slicer-mediated mechanism for repeat-associated siRNA 5' end formation in *Drosophila*. *Science* **315**, 1587-1590.
- Hahnenberger, K. M., Carbon, J. and Clarke, L. (1991). Identification of DNA regions required for mitotic and meiotic functions within the centromere of *Schizosaccharomyces pombe* chromosome I. *Mol. Cell. Biol.* **11**, 2206-2215.
- Hale, C. J., Stonaker, J. L., Gross, S. M. and Hollick, J. B. (2007). A novel Snf2 protein maintains trans-generational regulatory states established by paramutation in maize. *PLoS Biol.* **5**, e275.
- Hamilton, A., Voinnet, O., Chappell, L. and Baulcombe, D. (2002). Two classes of short interfering RNA in RNA silencing. *EMBO J.* **21**, 4671-4679.
- Handel, M. A. (2004). The XY body: a specialized meiotic chromatin domain. *Exp. Cell Res.* **296**, 57-63.
- Harrington, J. J., Van Bokkelen, G., Mays, R. W., Gustashaw, K. and Willard, H. F. (1997). Formation of de novo centromeres and construction of first-generation human artificial microchromosomes. *Nat. Genet.* **15**, 345-355.
- Hata, K., Kusumi, M., Yokomine, T., Li, E. and Sasaki, H. (2006). Meiotic and epigenetic aberrations in Dnmt3L-deficient male germ cells. *Mol. Reprod. Dev.* **73**, 116-122.
- Hawkins, P. G., Santoso, S., Adams, C., Anest, V. and Morris, K. V. (2009). Promoter targeted small RNAs induce long-term transcriptional gene silencing in human cells. *Nucleic Acids Res.* **37**, 2984-2995.
- He, X. J., Hsu, Y. F., Zhu, S., Wierzbicki, A. T., Pontes, O., Pikaard, C. S., Liu, H. L., Wang, C. S., Jin, H. and Zhu, J. K. (2009). An effector of RNA-directed DNA methylation in arabidopsis is an ARGONAUTE 4- and RNA-binding protein. *Cell* **137**, 498-508.
- Heslop-Harrison, J. S., Murata, M., Ogura, Y., Schwarzacher, T. and Motoyoshi, F. (1999). Polymorphisms and genomic organization of repetitive DNA from centromeric regions of Arabidopsis chromosomes. *Plant Cell* **11**, 31-42.
- Hirochika, H., Okamoto, H. and Kakutani, T. (2000). Silencing of retrotransposons in arabidopsis and reactivation by the ddm1 mutation. *Plant Cell* **12**, 357-369.
- Hitchins, M. P., Wong, J. J., Suthers, G., Suter, C. M., Martin, D. I., Hawkins, N. J. and Ward, R. L. (2007). Inheritance of a cancer-associated MLH1 germ-line epimutation. *New Engl. J. Med.* **356**, 697-705.
- Hollick, J. B. and Chandler, V. L. (2001). Genetic factors required to maintain repression of a paramutagenic maize pl1 allele. *Genetics* **157**, 369-378.
- Horvath, J. E., Viggiano, L., Loftus, B. J., Adams, M. D., Archidiacono, N., Rocchi, M. and Eichler, E. E. (2000). Molecular structure and evolution of an alpha satellite/non-alpha satellite junction at 16p11. *Hum. Mol. Genet.* **9**, 113-123.
- Houving, S., Kamminga, L. M., Berezikov, E., Cronembold, D., Girard, A., van den Elst, H., Filippov, D. V., Blaser, H., Raz, E., Moens, C. B. et al. (2007). A role for Piwi and piRNAs in germ cell maintenance and transposon silencing in Zebrafish. *Cell* **129**, 69-82.
- Houving, S., Berezikov, E. and Ketting, R. F. (2008). Zili is required for germ cell differentiation and meiosis in zebrafish. *EMBO J.* **27**, 2702-2711.
- Huang, J., Fan, T., Yan, Q., Zhu, H., Fox, S., Issaq, H. J., Best, L., Gangi, L., Munroe, D. and Muegge, K. (2004). Lsh, an epigenetic guardian of repetitive elements. *Nucleic Acids Res.* **32**, 5019-5028.
- Huetzel, B., Kanno, T., Daxinger, L., Aufsatz, W., Matzke, A. J. and Matzke, M. (2006). Endogenous targets of RNA-directed DNA methylation and Pol IV in Arabidopsis. *EMBO J.* **25**, 2828-2836.
- Ikeno, M., Grimes, B., Okazaki, T., Nakano, M., Saitoh, K., Hoshino, H., McGill, N. L., Cooke, H. and Masumoto, H. (1998). Construction of YAC-based mammalian artificial chromosomes. *Nat. Biotechnol.* **16**, 431-439.



- Ishii, K., Ogiyama, Y., Chikashige, Y., Soejima, S., Masuda, F., Kakuma, T., Hiraoka, Y. and Takahashi, K. (2008). Heterochromatin integrity affects chromosome reorganization after centromere dysfunction. *Science* **321**, 1088-1091.
- Jackson, J. P., Lindroth, A. M., Cao, X. and Jacobsen, S. E. (2002). Control of CpNpG DNA methylation by the KRYPTONITE histone H3 methyltransferase. *Nature* **416**, 556-560.
- Jackson, M. (2003). Duplicate, decouple, disperse: the evolutionary transience of human centromeric regions. *Curr. Opin. Genet. Dev.* **13**, 629-635.
- Jeddeloh, J. A., Bender, J. and Richards, E. J. (1998). The DNA methylation locus DDM1 is required for maintenance of gene silencing in Arabidopsis. *Genes Dev.* **12**, 1714-1725.
- Johnson, L., Cao, X. and Jacobsen, S. (2002). Interplay between two epigenetic marks. DNA methylation and histone H3 lysine 9 methylation. *Curr. Biol.* **12**, 1360-1367.
- Kagansky, A., Folco, H. D., Almeida, R., Pidoux, A. L., Boukaba, A., Simmer, F., Urano, T., Hamilton, G. L. and Allshire, R. C. (2009). Synthetic heterochromatin bypasses RNAi and centromeric repeats to establish functional centromeres. *Science* **324**, 1716-1719.
- Kanno, T., Mette, M. F., Kreil, D. P., Aufsatz, W., Matzke, M. and Matzke, A. J. (2004). Involvement of putative SNF2 chromatin remodeling protein DRD1 in RNA-directed DNA methylation. *Curr. Biol.* **14**, 801-805.
- Kato, H., Goto, D. B., Martienssen, R. A., Urano, T., Furukawa, K. and Murakami, Y. (2005). RNA polymerase II is required for RNAi-dependent heterochromatin assembly. *Science* **309**, 467-469.
- Kato, M., Miura, A., Bender, J., Jacobsen, S. E. and Kakutani, T. (2003). Role of CG and non-CG methylation in immobilization of transposons in Arabidopsis. *Curr. Biol.* **13**, 421-426.
- Kato, Y., Kaneda, M., Hata, K., Kumaki, K., Hisano, M., Kohara, Y., Okano, M., Li, E., Nozaki, M. and Sasaki, H. (2007). Role of the Dnmt3 family in de novo methylation of imprinted and repetitive sequences during male germ cell development in the mouse. *Hum. Mol. Genet.* **16**, 2272-2280.
- Kavi, H. H. and Birchler, J. A. (2009). Interaction of RNA polymerase II and the small RNA machinery affects heterochromatic silencing in Drosophila. *Epigenetics Chromatin* **2**, 15.
- Kawamura, Y., Saito, K., Kin, T., Ono, Y., Asai, K., Sunohara, T., Okada, T. N., Siomi, M. C. and Siomi, H. (2008). Drosophila endogenous small RNAs bind to Argonaute 2 in somatic cells. *Nature* **453**, 793-797.
- Ketting, R. F., Haverkamp, T. H., van Luenen, H. G. and Plasterk, R. H. (1999). Mut-7 of *C. elegans*, required for transposon silencing and RNA interference, is a homolog of Werner syndrome helicase and RNaseD. *Cell* **99**, 133-141.
- Khalil, A. M., Boyar, F. Z. and Driscoll, D. J. (2004). Dynamic histone modifications mark sex chromosome inactivation and reactivation during mammalian spermatogenesis. *Proc. Natl. Acad. Sci. USA* **101**, 16583-16587.
- Kim, D. H., Villeneuve, L. M., Morris, K. V. and Rossi, J. J. (2006). Argonaute-1 directs siRNA-mediated transcriptional gene silencing in human cells. *Nat. Struct. Mol. Biol.* **13**, 793-797.
- Klattenhoff, C. and Theurkauf, W. (2008). Biogenesis and germline functions of piRNAs. *Development* **135**, 3-9.
- Klattenhoff, C., Xi, H., Li, C., Lee, S., Xu, J., Khurana, J. S., Zhang, F., Schultz, N., Koppetsch, B. S., Nowosielska, A. et al. (2009). The Drosophila HP1 homolog Rhino is required for transposon silencing and piRNA production by dual-strand clusters. *Cell* **138**, 1137-1149.
- Klenov, M. S., Lavrov, S. A., Stolyarenko, A. D., Ryazansky, S. S., Aravin, A. A., Tuschl, T. and Gvozdev, V. A. (2007). Repeat-associated siRNAs cause chromatin silencing of retrotransposons in the Drosophila melanogaster germline. *Nucleic Acids Res.* **35**, 5430-5438.
- Kloc, A., Zaratigui, M., Nora, E. and Martienssen, R. (2008). RNA interference guides histone modification during the S phase of chromosomal replication. *Curr. Biol.* **18**, 490-495.
- Kniola, B., O'Toole, E., McIntosh, J. R., Mellone, B., Allshire, R., Mengarelli, S., Hultenby, K. and Ekwall, K. (2001). The domain structure of centromeres is conserved from fission yeast to humans. *Mol. Biol. Cell* **12**, 2767-2775.
- Kouzariades, T. (2007). Chromatin modifications and their function. *Cell* **128**, 693-705.
- Kumekawa, N., Hosouchi, T., Tsuruoka, H. and Kotani, H. (2000). The size and sequence organization of the centromeric region of Arabidopsis thaliana chromosome 5. *DNA Res.* **7**, 315-321.
- Kuramochi-Miyagawa, S., Watanabe, T., Gotoh, K., Totoki, Y., Toyoda, A., Ikawa, M., Asada, N., Kojima, K., Yamaguchi, Y., Ijiri, T. W. et al. (2008). DNA methylation of retrotransposon genes is regulated by Piwi family members MILI and MIWI2 in murine fetal testes. *Genes Dev.* **22**, 908-917.
- Lee, D. W., Pratt, R. J., McLaughlin, M. and Aramayo, R. (2003). An argonaute-like protein is required for meiotic silencing. *Genetics* **164**, 821-828.
- Lee, H. C., Chang, S. S., Choudhary, S., Aalto, A. P., Maiti, M., Bamford, D. H. and Liu, Y. (2009). qiRNA is a new type of small interfering RNA induced by DNA damage. *Nature* **459**, 274-277.
- Lehnertz, B., Ueda, Y., Derijck, A. A., Braunschweig, U., Perez-Burgos, L., Kubicek, S., Chen, T., Li, E., Jenuwein, T. and Peters, A. H. (2003). Suv39h-mediated histone H3 lysine 9 methylation directs DNA methylation to major satellite repeats at pericentric heterochromatin. *Curr. Biol.* **13**, 1192-1200.
- Leuschner, P. J., Ameres, S. L., Kueng, S. and Martinez, J. (2006). Cleavage of the siRNA passenger strand during RISC assembly in human cells. *EMBO Rep.* **7**, 314-320.
- Li, C. F., Pontes, O., El-Shami, M., Henderson, I. R., Bernatavichute, Y. V., Chan, S. W., Lagrange, T., Pikaard, C. S. and Jacobsen, S. E. (2006). An ARGONAUTE4-containing nuclear processing center colocalized with Cajal bodies in Arabidopsis thaliana. *Cell* **126**, 93-106.
- Li, H., Motamedi, M. R., Yip, C. K., Wang, Z., Walz, T., Patel, D. J. and Moazed, D. (2009). An alpha motif at Tas3 C terminus mediates RITS cis spreading and promotes heterochromatic gene silencing. *Mol. Cell* **34**, 155-167.
- Lindroth, A. M., Shultis, D., Jasencakova, Z., Fuchs, J., Johnson, L., Schubert, D., Patnaik, D., Pradhan, S., Goodrich, J., Schubert, I. et al. (2004). Dual histone H3 methylation marks at lysines 9 and 27 required for interaction with CHROMOMETHYLASE3. *EMBO J.* **23**, 4286-4296.
- Lipardi, C. and Paterson, B. M. (2009). Identification of an RNA-dependent RNA polymerase in Drosophila involved in RNAi and transposon suppression. *Proc. Natl. Acad. Sci. USA* **106**, 15645-15650.
- Lippman, Z., May, B., Yordan, C., Singer, T. and Martienssen, R. (2003). Distinct mechanisms determine transposon inheritance and methylation via small interfering RNA and histone modification. *PLoS Biol.* **1**, E67.
- Lister, R., O'Malley, R. C., Tonti-Filippini, J., Gregory, B. D., Berry, C. C., Millar, A. H. and Ecker, J. R. (2008). Highly integrated single-base resolution maps of the epigenome in Arabidopsis. *Cell* **133**, 523-536.
- Liu, Y., Mochizuki, K. and Gorovsky, M. A. (2004). Histone H3 lysine 9 methylation is required for DNA elimination in developing macronuclei in Tetrahymena. *Proc. Natl. Acad. Sci. USA* **101**, 1679-1684.
- Liu, Y., Taverna, S. D., Muratore, T. L., Shabanowitz, J., Hunt, D. F. and Allis, C. D. (2007). RNAi-dependent H3K27 methylation is required for heterochromatin formation and DNA elimination in Tetrahymena. *Genes Dev.* **21**, 1530-1545.
- Llave, C., Kasschau, K. D., Rector, M. A. and Carrington, J. C. (2002). Endogenous and silencing-associated small RNAs in plants. *Plant Cell* **14**, 1605-1619.
- Lu, C., Kulkarni, K., Souret, F. F., MuthuVallappan, R., Tej, S. S., Poethig, R. S., Henderson, I. R., Jacobsen, S. E., Wang, W., Green, P. J. et al. (2006). MicroRNAs and other small RNAs enriched in the Arabidopsis RNA-dependent RNA polymerase-2 mutant. *Genome Res.* **16**, 1276-1288.
- Luo, J. and Hall, B. D. (2007). A multistep process gave rise to RNA polymerase IV of land plants. *J. Mol. Evol.* **64**, 101-112.
- Mahadevaiah, S. K., Turner, J. M., Baudat, F., Rogakou, E. P., de Boer, P., Blanco-Rodriguez, J., Jasin, M., Keeney, S., Bonner, W. M. and Burgoyne, P. S. (2001). Recombinational DNA double-strand breaks in mice precede synapsis. *Nat. Genet.* **27**, 271-276.
- Mahadevaiah, S. K., Bourc'his, D., de Rooij, D. G., Bestor, T. H., Turner, J. M. and Burgoyne, P. S. (2008). Extensive meiotic asynapsis in mice antagonizes meiotic silencing of unsynapsed chromatin and consequently disrupts meiotic sex chromosome inactivation. *J. Cell Biol.* **182**, 263-276.
- Maida, Y., Yasukawa, M., Furuuchi, M., Lassmann, T., Possemato, R., Okamoto, N., Kasim, V., Hayashizaki, Y., Hahn, W. C. and Masutomi, K. (2009). An RNA-dependent RNA polymerase formed by TERT and the RMRP RNA. *Nature* **461**, 230-235.
- Maine, E. M., Hauth, J., Ratliff, T., Vought, V. E., She, X. and Kelly, W. G. (2005). EGO-1, a putative RNA-dependent RNA polymerase, is required for heterochromatin assembly on unpaired DNA during *C. elegans* meiosis. *Curr. Biol.* **15**, 1972-1978.
- Malone, C. D., Anderson, A. M., Motl, J. A., Rexer, C. H. and Chalker, D. L. (2005). Germ line transcripts are processed by a Dicer-like protein that is essential for developmentally programmed genome rearrangements of Tetrahymena thermophila. *Mol. Cell Biol.* **25**, 9151-9164.
- Malone, C. D., Brennecke, J., Dus, M., Stark, A., McCombie, W. R., Sachidanandam, R. and Hannon, G. J. (2009). Specialized piRNA pathways act in germline and somatic tissues of the Drosophila ovary. *Cell* **137**, 522-535.
- Manuelidis, L. and Wu, J. C. (1978). Homology between human and simian repeated DNA. *Nature* **276**, 92-94.
- Martens, J. H., O'Sullivan, R. J., Braunschweig, U., Opravil, S., Radolf, M., Steinlein, P. and Jenuwein, T. (2005). The profile of repeat-associated histone lysine methylation states in the mouse epigenome. *EMBO J.* **24**, 800-812.
- Martienssen, R. A., Zaratigui, M. and Goto, D. B. (2005). RNA interference and heterochromatin in the fission yeast *Schizosaccharomyces pombe*. *Trends Genet.* **21**, 450-456.
- Matranga, C., Tomari, Y., Shin, C., Bartel, D. P. and Zamore, P. D. (2005). Passenger-strand cleavage facilitates assembly of siRNA into Ago2-containing RNAi enzyme complexes. *Cell* **123**, 607-620.
- May, B. P., Lippman, Z. B., Fang, Y., Spector, D. L. and Martienssen, R. A. (2005). Differential regulation of strand-specific transcripts from Arabidopsis centromeric satellite repeats. *PLoS Genet.* **1**, e79.
- McClintock, B. (1950). The origin and behavior of mutable loci in maize. *Proc. Natl. Acad. Sci. USA* **36**, 344-355.
- Mette, M. F., Aufsatz, W., van der Winden, J., Matzke, M. A. and Matzke, A. J. (2000). Transcriptional silencing and promoter methylation triggered by double-stranded RNA. *EMBO J.* **19**, 5194-5201.
- Miura, A., Yonebayashi, S., Watanabe, K., Toyama, T., Shimada, H. and Kakutani, T. (2001). Mobilization of transposons by a mutation abolishing full DNA methylation in Arabidopsis. *Nature* **411**, 212-214.
- Mizuno, T., Chou, M. Y. and Inouye, M. (1984). A unique mechanism regulating gene expression: translational inhibition by a complementary RNA transcript (micRNA). *Proc. Natl. Acad. Sci. USA* **81**, 1966-1970.
- Moazed, D. (2009). Small RNAs in transcriptional gene silencing and genome defence. *Nature* **457**, 413-420.
- Mochizuki, K. and Gorovsky, M. A. (2005). A Dicer-like protein in Tetrahymena has distinct functions in genome rearrangement, chromosome segregation, and meiotic prophase. *Genes Dev.* **19**, 77-89.
- Monesi, V. (1965). Differential rate of ribonucleic acid synthesis in the autosomes and sex chromosomes during male meiosis in the mouse. *Chromosoma* **17**, 11-21.

- Moore, L. L., Morrison, M. and Roth, M. B. (1999). HCP-1, a protein involved in chromosome segregation, is localized to the centromere of mitotic chromosomes in *Caenorhabditis elegans*. *J. Cell Biol.* **147**, 471-480.
- Morris, K. V., Chan, S. W., Jacobsen, S. E. and Looney, D. J. (2004). Small interfering RNA-induced transcriptional gene silencing in human cells. *Science* **305**, 1289-1292.
- Mosher, R. A., Schwach, F., Studholme, D. and Baulcombe, D. C. (2008). PolIVb influences RNA-directed DNA methylation independently of its role in siRNA biogenesis. *Proc. Natl. Acad. Sci. USA* **105**, 3145-3150.
- Motamedi, M. R., Verdel, A., Colmenares, S. U., Gerber, S. A., Gygi, S. P. and Moazed, D. (2004). Two RNAi complexes, RITS and RDRC, physically interact and localize to noncoding centromeric RNAs. *Cell* **119**, 789-802.
- Munshi, A., Shafi, G., Aliya, N. and Jyothy, A. (2009). Histone modifications dictate specific biological readouts. *J. Genet. Genomics* **36**, 75-88.
- Nakaseko, Y., Adachi, Y., Funahashi, S., Niwa, O. and Yanagida, M. (1986). Chromosome walking shows a highly homologous repetitive sequence present in all the centromere regions of fission yeast. *EMBO J.* **5**, 1011-1021.
- Oegema, K., Desai, A., Rybina, S., Kirkham, M. and Hyman, A. A. (2001). Functional analysis of kinetochore assembly in *Caenorhabditis elegans*. *J. Cell Biol.* **153**, 1209-1226.
- Okano, M., Bell, D. W., Haber, D. A. and Li, E. (1999). DNA methyltransferases Dnmt3a and Dnmt3b are essential for de novo methylation and mammalian development. *Cell* **99**, 247-257.
- Pak, J. and Fire, A. (2007). Distinct populations of primary and secondary effectors during RNAi in *C. elegans*. *Science* **315**, 241-244.
- Pal-Bhadra, M., Leibovitch, B. A., Gandhi, S. G., Rao, M., Bhadra, U., Birchler, J. A. and Elgin, S. C. (2004). Heterochromatic silencing and HP1 localization in *Drosophila* are dependent on the RNAi machinery. *Science* **303**, 669-672.
- Partridge, J. F., Borgstrom, B. and Allshire, R. C. (2000). Distinct protein interaction domains and protein spreading in a complex centromere. *Genes Dev.* **14**, 783-791.
- Phalke, S., Nickel, O., Walluscheck, D., Hortic, F., Onorati, M. C. and Reuter, G. (2009). Retrotransposon silencing and telomere integrity in somatic cells of *Drosophila* depends on the cytosine-5 methyltransferase DNMT2. *Nat. Genet.* **41**, 696-702.
- Pontier, D., Yahubyan, G., Vega, D., Bulski, A., Saez-Vasquez, J., Hakimi, M. A., Lerbs-Mache, S., Colot, V. and Lagrange, T. (2005). Reinforcement of silencing at transposons and highly repeated sequences requires the concerted action of two distinct RNA polymerases IV in *Arabidopsis*. *Genes Dev.* **19**, 2030-2040.
- Pratt, R. J., Lee, D. W. and Aramayo, R. (2004). DNA methylation affects meiotic trans-sensing, not meiotic silencing, in *Neurospora*. *Genetics* **168**, 1925-1935.
- Qi, Y., He, X., Wang, X. J., Kohany, O., Jurka, J. and Hannon, G. J. (2006). Distinct catalytic and non-catalytic roles of ARGONAUTE4 in RNA-directed DNA methylation. *Nature* **443**, 1008-1012.
- Quina, A. S., Buschbeck, M. and Di Croce, L. (2006). Chromatin structure and epigenetics. *Biochem. Pharmacol.* **72**, 1563-1569.
- Rand, T. A., Petersen, S., Du, F. and Wang, X. (2005). Argonaute2 cleaves the anti-guide strand of siRNA during RISC activation. *Cell* **123**, 621-629.
- Rassoulzadegan, M., Grandjean, V., Gounon, P., Vincent, S., Gillot, I. and Cuzin, F. (2006). RNA-mediated non-Mendelian inheritance of an epigenetic change in the mouse. *Nature* **441**, 469-474.
- Reddy, K. C. and Villeneuve, A. M. (2004). *C. elegans* HIM-17 links chromatin modification and competence for initiation of meiotic recombination. *Cell* **118**, 439-452.
- Reinhart, B. J. and Bartel, D. P. (2002). Small RNAs correspond to centromere heterochromatic repeats. *Science* **297**, 1831.
- Richards, E. J., Goodman, H. M. and Ausubel, F. M. (1991). The centromere region of *Arabidopsis thaliana* chromosome 1 contains telomere-similar sequences. *Nucleic Acids Res.* **19**, 3351-3357.
- Robert, V. J., Sijen, T., van Wolfswinkel, J. and Plasterk, R. H. (2005). Chromatin and RNAi factors protect the *C. elegans* germline against repetitive sequences. *Genes Dev.* **19**, 782-787.
- Rosenfeld, J. A., Wang, Z., Schones, D. E., Zhao, K., DeSalle, R. and Zhang, M. Q. (2009). Determination of enriched histone modifications in non-genic portions of the human genome. *BMC Genomics* **10**, 143.
- Schoenmakers, S., Wassenaar, E., van Cappellen, W. A., Derijck, A. A., de Boer, P., Laven, J. S., Grootegoed, J. A. and Baarends, W. M. (2008). Increased frequency of asynapsis and associated meiotic silencing of heterologous chromatin in the presence of irradiation-induced extra DNA double strand breaks. *Dev. Biol.* **317**, 270-281.
- Schueler, M. G. and Sullivan, B. A. (2006). Structural and functional dynamics of human centromeric chromatin. *Annu. Rev. Genomics Hum. Genet.* **7**, 301-313.
- She, X., Xu, X., Fedotov, A., Kelly, W. G. and Maine, E. M. (2009). Regulation of heterochromatin assembly on unpaired chromosomes during *Caenorhabditis elegans* meiosis by components of a small RNA-mediated pathway. *PLoS Genet.* **5**, e1000624.
- Shiu, P. K., Raju, N. B., Zickler, D. and Metzberg, R. L. (2001). Meiotic silencing by unpaired DNA. *Cell* **107**, 905-916.
- Sidorenko, L., Dorweiler, J. E., Cigan, A. M., Arteaga-Vazquez, M., Vyas, M., Kermicle, J., Jurcin, D., Brzeski, J., Cai, Y. and Chandler, V. L. (2009). A dominant mutation in mediator of paramutation2, one of three second-largest subunits of a plant-specific RNA polymerase, disrupts multiple siRNA silencing processes. *PLoS Genet.* **5**, e1000725.
- Sijen, T. and Plasterk, R. H. (2003). Transposon silencing in the *Caenorhabditis elegans* germ line by natural RNAi. *Nature* **426**, 310-314.
- Sijen, T., Vijn, I., Rebocho, A., van Blokland, R., Roelofs, D., Mol, J. N. and Kooter, J. M. (2001). Transcriptional and posttranscriptional gene silencing are mechanistically related. *Curr. Biol.* **11**, 436-440.
- Sijen, T., Steiner, F. A., Thijssen, K. L. and Plasterk, R. H. (2007). Secondary siRNAs result from unprimed RNA synthesis and form a distinct class. *Science* **315**, 244-247.
- Slotkin, R. K., Vaughn, M., Borges, F., Tanurdzic, M., Becker, J. D., Feijo, J. A. and Martienssen, R. A. (2009). Epigenetic reprogramming and small RNA silencing of transposable elements in pollen. *Cell* **136**, 461-472.
- Soper, S. F., van der Heijden, G. W., Hardiman, T. C., Goodheart, M., Martin, S. L., de Boer, P. and Bortvin, A. (2008). Mouse maelstrom, a component of nuage, is essential for spermatogenesis and transposon repression in meiosis. *Dev. Cell* **15**, 285-297.
- Soppe, W. J., Jasencakova, Z., Houben, A., Kakutani, T., Meister, A., Huang, M. S., Jacobsen, S. E., Schubert, I. and Franz, P. F. (2002). DNA methylation controls histone H3 lysine 9 methylation and heterochromatin assembly in *Arabidopsis*. *EMBO J.* **21**, 6549-6559.
- Spence, J. M., Critcher, R., Ebersole, T. A., Valdivia, M. M., Earnshaw, W. C., Fukagawa, T. and Farr, C. J. (2002). Co-localization of centromere activity, proteins and topoisomerase II within a subdomain of the major human X alpha-satellite array. *EMBO J.* **21**, 5269-5280.
- Stam, M., Belete, C., Dorweiler, J. E. and Chandler, V. L. (2002a). Differential chromatin structure within a tandem array 100 kb upstream of the maize b1 locus is associated with paramutation. *Genes Dev.* **16**, 1906-1918.
- Stam, M., Belete, C., Ramakrishna, W., Dorweiler, J. E., Bennetzen, J. L. and Chandler, V. L. (2002b). The regulatory regions required for B' paramutation and expression are located far upstream of the maize b1 transcribed sequences. *Genetics* **162**, 917-930.
- Steiner, F. A., Okihara, K. L., Hoogstrate, S. W., Sijen, T. and Ketting, R. F. (2009). RDE-1 slicer activity is required only for passenger-strand cleavage during RNAi in *Caenorhabditis elegans*. *Nat. Struct. Mol. Biol.* **16**, 207-211.
- Sugiyama, T., Cam, H., Verdel, A., Moazed, D. and Grewal, S. I. (2005). RNA-dependent RNA polymerase is an essential component of a self-enforcing loop coupling heterochromatin assembly to siRNA production. *Proc. Natl. Acad. Sci. USA* **102**, 152-157.
- Tabara, H., Sarkissian, M., Kelly, W. G., Fleenor, J., Grishok, A., Timmons, L., Fire, A. and Mello, C. C. (1999). The rde-1 gene, RNA interference, and transposon silencing in *C. elegans*. *Cell* **99**, 123-132.
- Tariq, M., Saze, H., Probst, A. V., Lichota, J., Habu, Y. and Paszkowski, J. (2003). Erasure of CpG methylation in *Arabidopsis* alters patterns of histone H3 methylation in heterochromatin. *Proc. Natl. Acad. Sci. USA* **100**, 8823-8827.
- Taverna, S. D., Coyne, R. S. and Allis, C. D. (2002). Methylation of histone h3 at lysine 9 targets programmed DNA elimination in tetrahymena. *Cell* **110**, 701-711.
- Tijsterman, M., Ketting, R. F., Okihara, K. L., Sijen, T. and Plasterk, R. H. (2002). RNA helicase MUT-14-dependent gene silencing triggered in *C. elegans* by short antisense RNAs. *Science* **295**, 694-697.
- Tops, B. B., Tabara, H., Sijen, T., Simmer, F., Mello, C. C., Plasterk, R. H. and Ketting, R. F. (2005). RDE-2 interacts with MUT-7 to mediate RNA interference in *Caenorhabditis elegans*. *Nucleic Acids Res.* **33**, 347-355.
- Tran, R. K., Zilberman, D., de Bustos, C., Ditt, R. F., Henikoff, J. G., Lindroth, A. M., Delrow, J., Boyle, T., Kwong, S., Bryson, T. D. et al. (2005). Chromatin and siRNA pathways cooperate to maintain DNA methylation of small transposable elements in *Arabidopsis*. *Genome Biol.* **6**, R90.
- Turner, J. M., Aprelikova, O., Xu, X., Wang, R., Kim, S., Chandramouli, G. V., Barrett, J. C., Burgoyne, P. S. and Deng, C. X. (2004). BRCA1, histone H2AX phosphorylation, and male meiotic sex chromosome inactivation. *Curr. Biol.* **14**, 2135-2142.
- Turner, J. M., Mahadevaiah, S. K., Fernandez-Capetillo, O., Nussenzweig, A., Xu, X., Deng, C. X. and Burgoyne, P. S. (2005). Silencing of unsynapsed meiotic chromosomes in the mouse. *Nat. Genet.* **37**, 41-47.
- Tyler-Smith, C., Oakley, R. J., Larin, Z., Fisher, R. B., Crocker, M., Affara, N. A., Ferguson-Smith, M. A., Muenke, M., Zuffardi, O. and Jobling, M. A. (1993). Localization of DNA sequences required for human centromere function through an analysis of rearranged Y chromosomes. *Nat. Genet.* **5**, 368-375.
- Vagin, V. V., Klenov, M. S., Kalmykova, A. I., Stolyarenko, A. D., Kotelnikov, R. N. and Gvozdev, V. A. (2004). The RNA interference proteins and vasa locus are involved in the silencing of retrotransposons in the female germline of *Drosophila melanogaster*. *RNA Biol.* **1**, 54-58.
- van Wolfswinkel, J. C., Claycomb, J. M., Batista, P. J., Mello, C. C., Berezikov, E. and Ketting, R. F. (2009). CDE-1 affects chromosome segregation through uridylation of CSR-1-bound siRNAs. *Cell* **139**, 135-148.
- Vastenhouw, N. L., Fischer, S. E., Robert, V. J., Thijssen, K. L., Fraser, A. G., Kamath, R. S., Ahiring, J. and Plasterk, R. H. (2003). A genome-wide screen identifies 27 genes involved in transposon silencing in *C. elegans*. *Curr. Biol.* **13**, 1311-1316.
- Verdel, A., Jia, S., Gerber, S., Sugiyama, T., Gygi, S., Grewal, S. I. and Moazed, D. (2004). RNAi-mediated targeting of heterochromatin by the RITS complex. *Science* **303**, 672-676.
- Verdel, A., Vavasseur, A., Le Gorrec, M. and Touat-Todeschini, L. (2009). Common themes in siRNA-mediated epigenetic silencing pathways. *Int. J. Dev. Biol.* **53**, 245-257.
- Volpe, T. A., Kidner, C., Hall, I. M., Teng, G., Grewal, S. I. and Martienssen, R. A. (2002). Regulation of heterochromatic silencing and histone H3 lysine-9 methylation by RNAi. *Science* **297**, 1833-1837.
- Volpe, T. A., Schramke, V., Hamilton, G. L., White, S. A., Teng, G., Martienssen, R. A. and Allshire, R. C. (2003). RNA interference is required for normal centromere function in fission yeast. *Chromosome Res.* **11**, 137-146.
- Wade, C. M., Giulotto, E., Sigurdsson, S., Zoli, M., Gnerre, S., Imslode, F., Lear, T. L., Adelson, D. L., Bailey, E., Bellone, R. R. et al. (2009). Genome sequence,

- comparative analysis, and population genetics of the domestic horse. *Science* **326**, 865-867.
- Walsh, C. P., Chaillet, J. R. and Bestor, T. H. (1998). Transcription of IAP endogenous retroviruses is constrained by cytosine methylation. *Nat. Genet.* **20**, 116-117.
- Warburton, P. E., Cooke, C. A., Bourassa, S., Vafa, O., Sullivan, B. A., Stetten, G., Gimelli, G., Warburton, D., Tyler-Smith, C., Sullivan, K. F. et al. (1997). Immunolocalization of CENP-A suggests a distinct nucleosome structure at the inner kinetochore plate of active centromeres. *Curr. Biol.* **7**, 901-904.
- Wassenegger, M. (2000). RNA-directed DNA methylation. *Plant Mol. Biol.* **43**, 203-220.
- Watanabe, T., Takeda, A., Tsukiyama, T., Mise, K., Okuno, T., Sasaki, H., Minami, N. and Imai, H. (2006). Identification and characterization of two novel classes of small RNAs in the mouse germline: retrotransposon-derived siRNAs in oocytes and germline small RNAs in testes. *Genes Dev.* **20**, 1732-1743.
- Webster, K. E., O'Bryan, M. K., Fletcher, S., Crewther, P. E., Aapola, U., Craig, J., Harrison, D. K., Aung, H., Phutikanit, N., Lyle, R. et al. (2005). Meiotic and epigenetic defects in Dnmt3L-knockout mouse spermatogenesis. *Proc. Natl. Acad. Sci. USA* **102**, 4068-4073.
- Weinberg, M. S., Villeneuve, L. M., Ehsani, A., Amarzguioui, M., Aagaard, L., Chen, Z. X., Riggs, A. D., Rossi, J. J. and Morris, K. V. (2006). The antisense strand of small interfering RNAs directs histone methylation and transcriptional gene silencing in human cells. *RNA* **12**, 256-262.
- Wevrick, R. and Willard, H. F. (1989). Long-range organization of tandem arrays of alpha satellite DNA at the centromeres of human chromosomes: high-frequency array-length polymorphism and meiotic stability. *Proc. Natl. Acad. Sci. USA* **86**, 9394-9398.
- Wierzbicki, A. T., Haag, J. R. and Pikaard, C. S. (2008). Noncoding transcription by RNA polymerase Pol IVb/Pol V mediates transcriptional silencing of overlapping and adjacent genes. *Cell* **135**, 635-648.
- Willard, H. F., Smith, K. D. and Sutherland, J. (1983). Isolation and characterization of a major tandem repeat family from the human X chromosome. *Nucleic Acids Res.* **11**, 2017-2033.
- Win, T. Z., Stevenson, A. L. and Wang, S. W. (2006). Fission yeast cid12 has dual functions in chromosome segregation and checkpoint control. *Mol. Cell. Biol.* **26**, 4435-4447.
- Wong, L. H., Brettingham-Moore, K. H., Chan, L., Quach, J. M., Anderson, M. A., Northrop, E. L., Hannan, R., Saffery, R., Shaw, M. L., Williams, E. et al. (2007). Centromere RNA is a key component for the assembly of nucleoproteins at the nucleolus and centromere. *Genome Res.* **17**, 1146-1160.
- Yan, Q., Cho, E., Lockett, S. and Muegge, K. (2003). Association of Lsh, a regulator of DNA methylation, with pericentromeric heterochromatin is dependent on intact heterochromatin. *Mol. Cell. Biol.* **23**, 8416-8428.
- Yang, T. P., Hansen, S. K., Oishi, K. K., Ryder, O. A. and Hamkalo, B. A. (1982). Characterization of a cloned repetitive DNA sequence concentrated on the human X chromosome. *Proc. Natl. Acad. Sci. USA* **79**, 6593-6597.
- Yigit, E., Batista, P. J., Bei, Y., Pang, K. M., Chen, C. C., Tolia, N. H., Joshua-Tor, L., Mitani, S., Simard, M. J. and Mello, C. C. (2006). Analysis of the *C. elegans* Argonaute family reveals that distinct Argonautes act sequentially during RNAi. *Cell* **127**, 747-757.
- Zhang, K., Mosch, K., Fischle, W. and Grewal, S. I. (2008). Roles of the H3K9 methyltransferase complex in nucleation, spreading and maintenance of heterochromatin. *Nat. Struct. Mol. Biol.* **15**, 381-388.
- Zhang, X., Yazaki, J., Sundaresan, A., Cokus, S., Chan, S. W., Chen, H., Henderson, I. R., Shinn, P., Pellegrini, M., Jacobsen, S. E. et al. (2006). Genome-wide high-resolution mapping and functional analysis of DNA methylation in arabidopsis. *Cell* **126**, 1189-1201.
- Zilberman, D., Cao, X. and Jacobsen, S. E. (2003). ARGONAUTE4 control of locus-specific siRNA accumulation and DNA and histone methylation. *Science* **299**, 716-719.
